# Supplementary material for: A high throughput screening method for the nano-crystallization of salts of organic cations
Source: PubMed Central journal article supplement — Chem Sci. 2018 Mar 12;9(15):3716–22. doi: 10.1039/c8sc00783g (PMC5939191; doi:10.1039/c8sc00783g), 2018-03-12
Supplement: SC-009-C8SC00783G-s001.pdf [file SC-009-C8SC00783G-s001.pdf]

## Electronic supplementary information for

# **A high throughput screening method for the nano-crystallization of salts of organic cations**

Philipp P. Nievergelt, Martin Babor, Jan Čejka, Bernhard Spingler\*

\*Corresponding author: [spingler@chem.uzh.ch](mailto:spingler@chem.uzh.ch)

### Content:

1. Materials and Methods
  - 1.1 Chemicals
  - 1.2 Stock Solutions including Supplementary Table 1
  - 1.3 Crystallization of Compounds incl. Supplementary Figures 1-3
  - 1.4 X-ray Single Crystal Diffraction
2. Description of the Structures including Supplementary Figures 4-26 and Supplementary Tables 2-8

## 1. Materials and Methods:

### 1.1. Chemicals

5-benzyloxytryptamine hydrochloride (**[BaH]Cl**) was obtained from Acros Organics, Geel, Belgium. N-Butylscopolammonium bromide (also described as butylscopolamine bromide or hyoscine butylbromide **[Bs]Br**), (1*S*,2*R*)-(+)-ephedrine hydrochloride (**[(+)-EphH]Cl**) and trazodone hydrochloride (**[TrH]Cl**) were obtained from Sigma Aldrich. (*R,S*)-carnitinenitrile chloride (**[(+/-)-Car]Cl**) was obtained from Frontier Scientific, Logan, UT, USA. (*R*)-carnitinenitrile chloride (**[(-)-Car]Cl**) was obtained from Angene Chemical, Hong Kong, HK. 2-(3-(3,5-bis(trifluoromethyl)phenyl)thioureido)-*N,N,N*-trimethylethanammonium iodide (**[Cat]I**) was kindly provided by Prof. Dr. Mario Waser, Linz, Austria; it was prepared analogously as described in <sup>1</sup>. The used water was doubly distilled. Sodium or potassium salts of counterions (SCI) were obtained from various commercial suppliers. If the sodium or potassium salts were not commercially available, the corresponding sodium salts were prepared by titration of the corresponding acids with a hydroxide sodium solution (2 M) until the pH reached 7. The solutions of newly prepared salts were concentrated with the help of a rotary evaporator and dried by lyophilisation at 0.02 mbar. The water content was determined by elemental analysis (carbon, hydrogen and nitrogen) of the salt.

### 1.2. Stock Solutions

The stock solutions of (*R,S*)-carnitinenitrile chloride, (*R*)-carnitinenitrile chloride, (1*S*,2*R*)-(+)-ephedrine hydrochloride, trazodone hydrochloride and iodide catalyst were employed at 90% concentration of the saturated solutions. The approximate solubilities of (*R,S*)- and (*R*)-carnitinenitrile chloride were determined by slowly dissolving solid material in water in steps of 10  $\mu$ l with intense stirring until a clear solution was observed under a microscope (see Supplementary Table 1).

Supplementary Table 1: Determination of apparent solubility of butylscopolamine bromide, carnitinenitrile chloride and trazodone hydrochloride by the dissolution method.

|                                          | m<br>[mg] | Last step<br>[μl] | Total volume<br>[μl] | Approximate apparent<br>solubility [mg / ml] |
|------------------------------------------|-----------|-------------------|----------------------|----------------------------------------------|
| butylscopolamine bromide                 | 158       | 10                | 90                   | 1800 ± 200                                   |
| ( <i>R,S</i> )-carnitinenitrile chloride | 78        | 10                | 70                   | 1120 ± 160                                   |
| ( <i>R</i> )-carnitinenitrile chloride   | 76        | 10                | 60                   | 1300 ± 200                                   |
| trazodone hydrochloride                  | 10        | 10                | 260                  | 38.5 ± 0.2                                   |

[Cat]I (5 mg), trazodone hydrochloride (35 mg) and 5-benzyloxytryptamine hydrochloride [BaH]Cl (20 mg) were each suspended in water (1 ml). The suspensions were stirred at 22°C for 1 day, centrifuged and filtered through a sterile filter with a pore size of 0.20 μm to yield saturated solutions. Those were finally diluted with water in a volume ratio of 90:10 to yield 90% saturated solutions. The solubility of [BaH]Cl, [Cat]I and [EphH]Cl were determined by precisely weighing about 1 mg of material and dissolving it in a defined volume of a 1:1 mixture of water and methanol (just water for [EphH]Cl). With this stock solution, a calibration curve in a HPLC system was generated. The saturated aqueous solution was generated as described before, isolated and diluted ten-fold. The concentration of this solution was determined by HPLC using the previously generated calibration curve. The so determined solubilities were 2.2 ± 0.1 mg / ml for [BaH]Cl, 6.9 ± 0.1 mg / ml for [Cat]I and 257 ± 1 mg / ml for [EphH]Cl in water at 22°C.

The concentrations of stock solutions of the sodium or potassium salts of counterions (SCI) were chosen such as that they were approximately half-saturated. For some highly soluble SCI, additional solutions were generated with lower concentrations. All stock solutions were filtered through sterile filters with a pore size of 0.20 μm. Solubility data were taken from the literature or determined experimentally. The approximate experimental solubility of the sodium or potassium SCI was determined at 22°C by slowly dissolving solid material (between 20 - 200 mg) in water (in steps of 10 - 20 μl) with intense stirring till a clear solution was observed under a microscope. The final concentration was calculated after the volume change of solutions caused by dissolving the solid salts was taken into consideration. Unfortunately, a few salts have some inappropriate physico-chemical properties and we had to use different approaches for preparing the stock solutions.

Disodium DL-tartrate is too hygroscopic to be isolated. A saturated solution was prepared (stirring the suspension for 48 h at 22°C) and this solution was diluted to 50%. The approximate molarity was calculated based on weight change (0.106 g) after drying in a rotary evaporator of 1 ml 50% solution (5 hours, 60 °C and 68 mbar). The calculation of molarity was made with the molar mass of anhydrous disodium DL-tartrate (194.051 g/mol).

Sodium pyrrolidone carboxylate, sodium hexanoate, sodium 2-ethylhexanoate and sodium octanoate all produce gels. Suitable viscous solutions of these salts were used like stock solutions. Sodium pyrrolidone carboxylate cannot be isolated as a powder due to its high hygroscopicity and approximate molarity was calculated based on weight change (0.749 g) after drying in the rotary evaporator 1 ml of the stock solution (5 hours, 60 °C and 68 mbar). The calculation of molarity was made with the molar mass of the anhydrous sodium pyrrolidone carboxylate (151.11 g/mol).

Sodium DL-lactate and sodium L-lactate both produce gels. Solutions of sodium DL-lactate and sodium L-lactate were prepared with a concentration of 30% m (salt) / m (water) based on the concentration of commercially available solutions (50% solution).

### 1.3. Crystallization of Compounds

The principle of the vapour diffusion <sup>2</sup> is shown in Supplementary Fig. 1. The crystallization screening experiments were performed with the help of the Gryphon LCP nano-drop handler from Art Robbins Instruments in ARI Intelli-Plates 96-3 LVR. 100 - 500 nl of a stock solution of the to be crystallized cation were mixed with the same volume of the stock solutions of the SCI and equilibrated against 75 µl of the stock solution of the same SCI. Each cation was tested for crystallization in 96 wells, each well containing a different condition, and with 77 different SCI in total. Due to the high viscosity of some solutions, all pipetting was done with slow speed. Plates were incubated for 5 - 16 days at 20°C. At the beginning of the study, some plates were additionally incubated at 4°C. The Rock Imager 1000 took a picture of each well with normal light (immediately after setting up the plate and then after 2, 5, 10 and 16 days) and cross polarized light (immediately after setting up the plate and then after 5, 10 and 16 days) (see Supplementary Fig. 2).

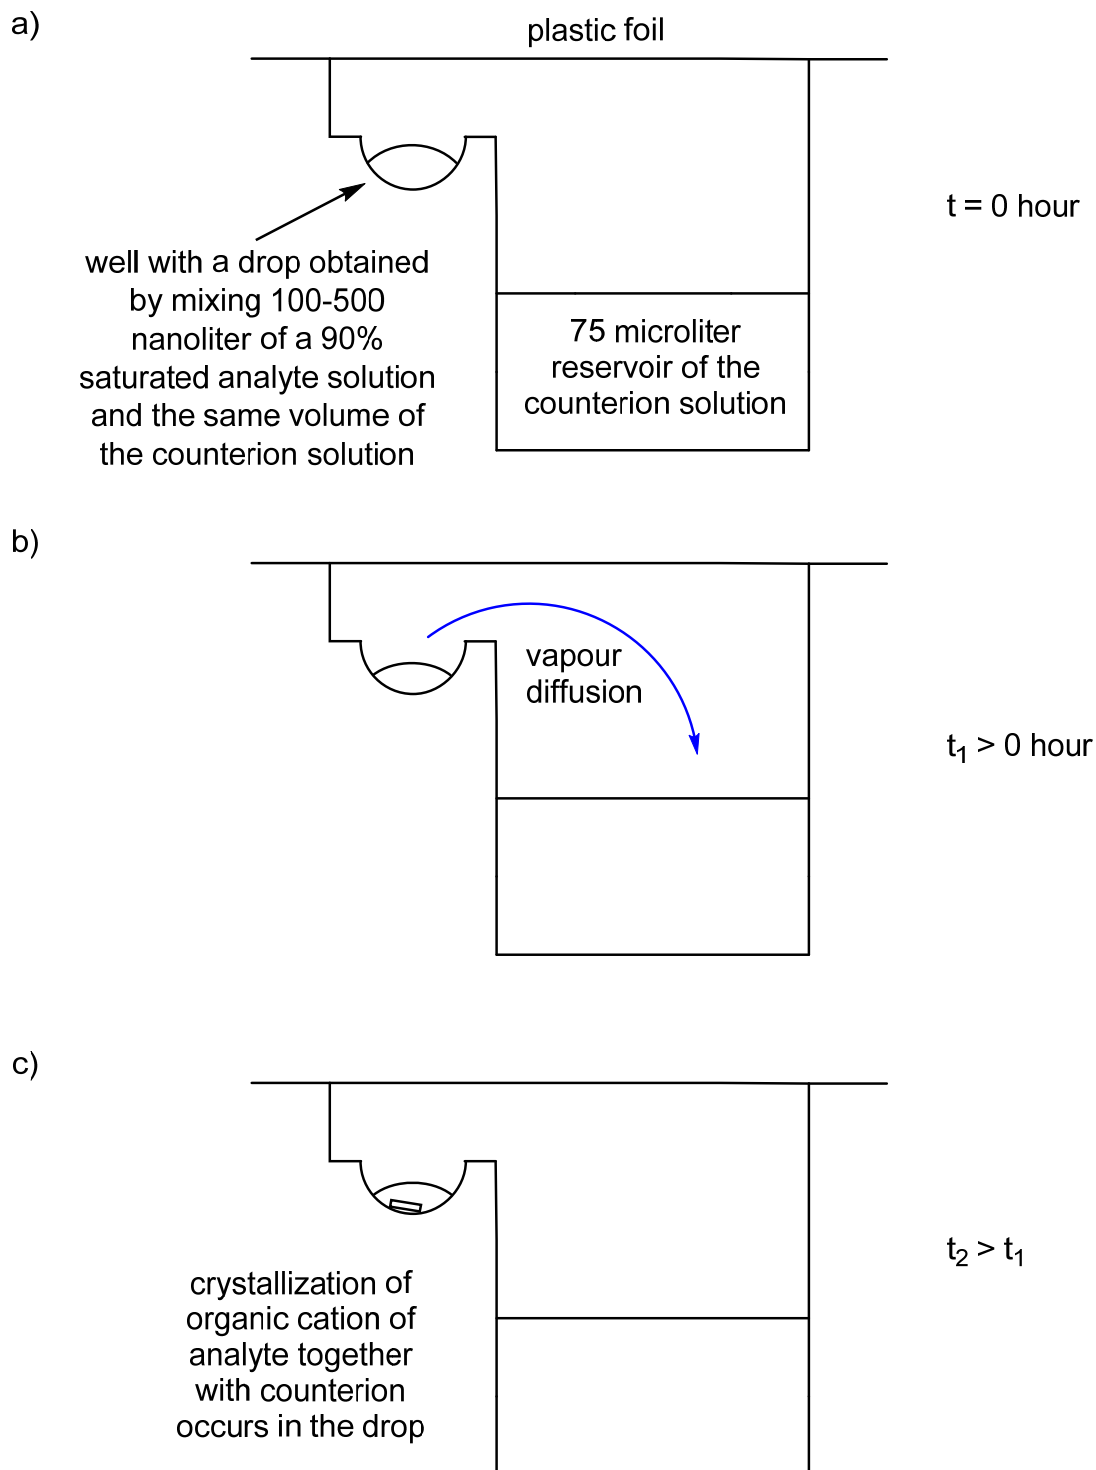

Supplementary Figure 1: Adopted vapour diffusion technique for the crystallization of organic cations.

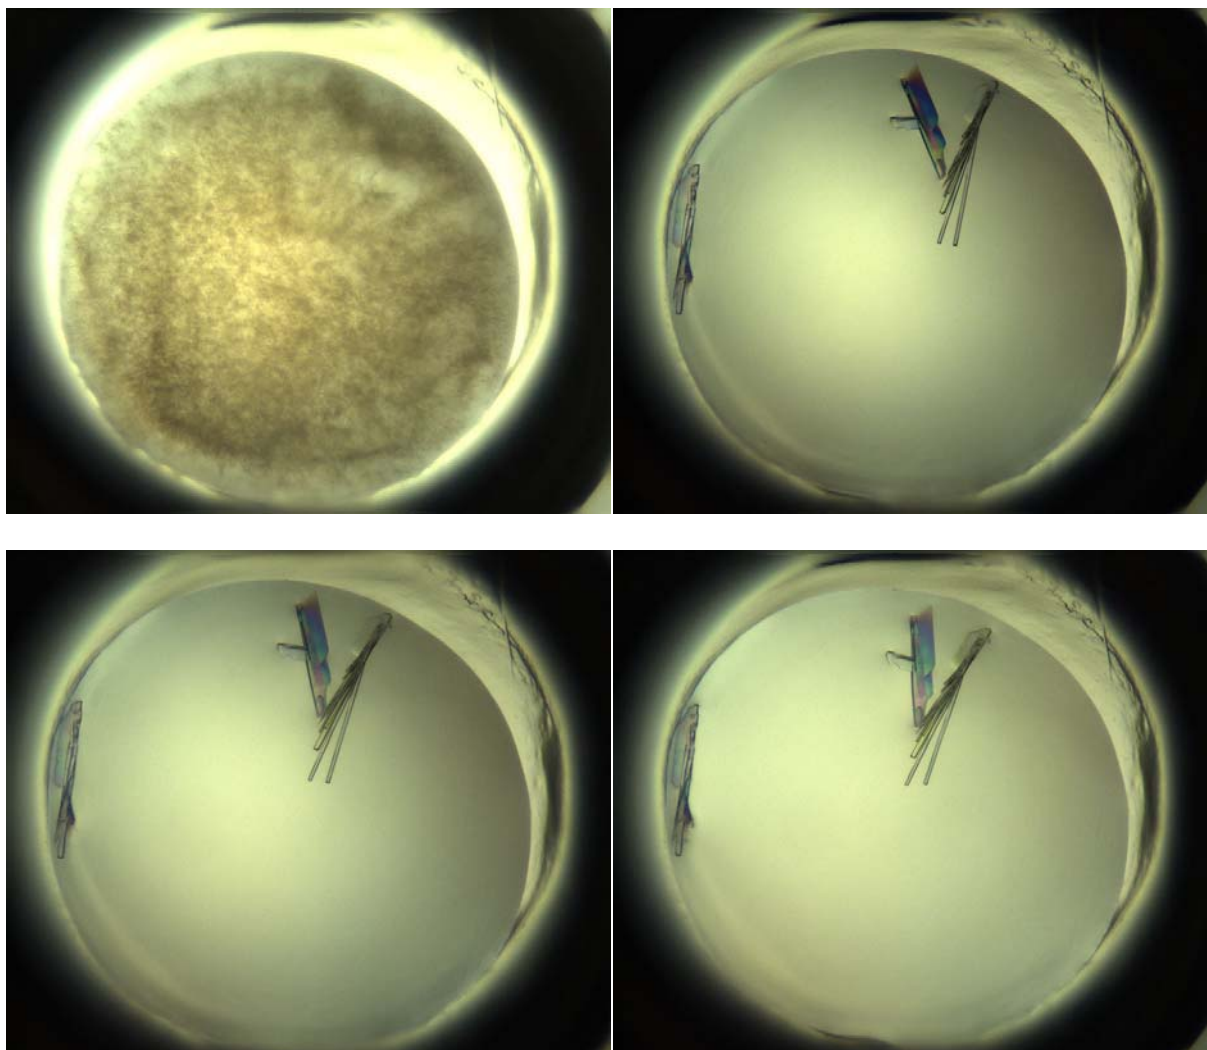

Supplementary Figure 2: Pictures of the crystallization of 5-benzyloxytryptaminium antimony-L-tartrate from 5-benzyloxytryptaminium chloride and potassium antimony-L-tartrate (500 nl each). Pictures shown were taken immediately after setting up the plate (top left) and then after 2 (top right), 5 (bottom left) and 16 (bottom right) days.

If single crystals were observed during this incubation period, they were removed from the wells. In order to do so, wells with formed crystals were opened with a razor blade. Sometimes, the contents of the wells were then covered with oil (Infineum V8512, formerly known as Paratone N). The crystals were fished out with a nylon loop mounted on top of a CrystalCap Magnetic™ (Hampton Research), prepared on a glass slide under oil (Infineum V8512) and measured on a single crystal X-ray diffractometer. The quality of some crystalline material was too poor for structure determination by X-ray single crystal diffraction. These hits were then manually re-synthesized and re-crystallized to obtain better crystals.

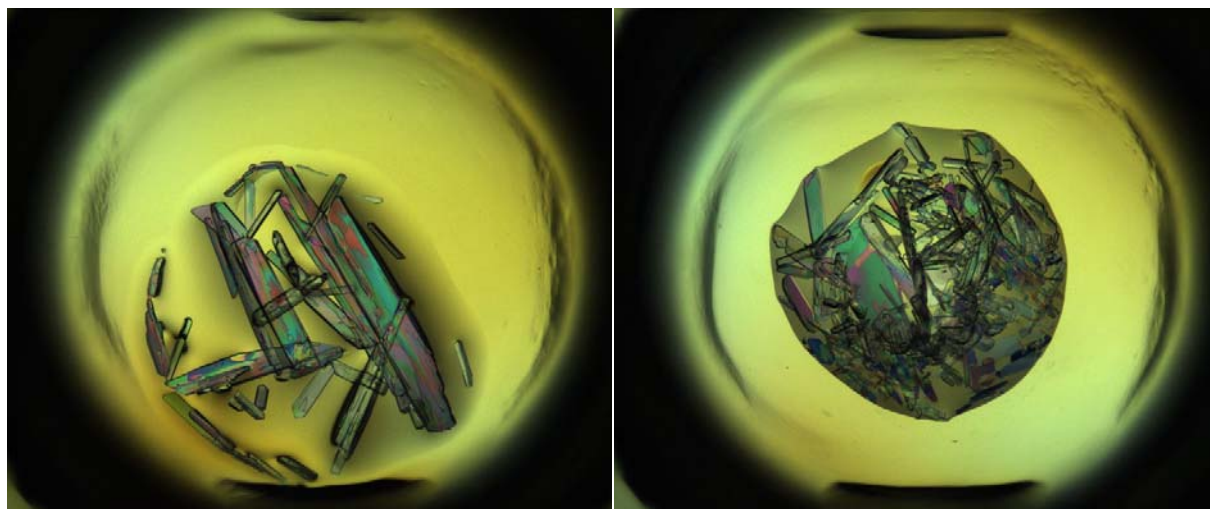

Supplementary Figure 3: Pictures of the crystallization of ephedrine hydrobromide (left) from ephedrine hydrochloride and sodium bromide (100 nl each) and ephedrinium thiocyanate (right) from ephedrine hydrochloride and sodium thiocyanate (100 nl each). Pictures shown were taken after 5 days.

#### 1.4. X-ray Single Crystal Diffraction

Single-crystal X-ray diffraction was measured on two diffractometers. The first one was a Rigaku-Oxford Diffraction XtaLAB Synergy-S dual source diffractometer: Kappa-axis four-circle goniometer with a Dectris Pilatus3 R 200K HPC (Hybrid Photon Counting) detector and Cu and Mo PhotonJet microfocus X-ray sources. The second one was a SuperNova dual source diffractometer: Kappa-axis four-circle goniometer with an Atlas electronic CCD area detector and Cu and Mo microfocus X-ray sources. Computing of measuring strategy and data reduction were performed with *CrysAlis<sup>Pro</sup>*<sup>3</sup>. The structures were solved with direct methods using *SIR97*<sup>4</sup> or the charge flipping method using *Superflip*<sup>5</sup>. The structures were refined by full-matrix least-squares methods on  $F^2$  with *SHELXL-2014*<sup>6</sup> using the GUI *ShelXle*<sup>7</sup> or refined by least-squares methods on  $F^2$  with *CRYSTALS*<sup>8</sup>. Graphical output was produced with the help of the program *Mercury*<sup>9</sup>. CCDC 1585747-1585765 and 1823199-1823201 contain the Supplementary crystallographic data for this paper. These data can be obtained free of charge from The Cambridge Crystallographic Data Centre via [www.ccdc.cam.ac.uk/structures](http://www.ccdc.cam.ac.uk/structures).

## 2. Description of the structures

### [5-benzyloxytryptaminium][chloride]

Crystalline material was obtained from the screening (from a drop containing 500 nl of a 3.0 M sodium chloride and 500 nl of a 90% saturated 5-benzyloxytryptamine hydrochloride solution equilibrating against a reservoir of 3 M sodium chloride, as well as from a drop containing 500 nl of a 1.5 M sodium chloride and 500 nl of a 90% saturated 5-benzyloxytryptamine hydrochloride solution equilibrating against a reservoir of 1.5 M sodium chloride). The quality of the crystals from both experiments was too low for structure determination by SCXRD. The crystal used for SCXRD was crystallized from a mixture of 20  $\mu\text{l}$  of 3 M sodium chloride in water, 20  $\mu\text{l}$  of a 90% saturated solution of 5-benzyloxytryptamine hydrochloride in water and 80  $\mu\text{l}$  acetone. The crystallization technique was slow evaporation in an 1.5 ml Eppendorf vial. This complex crystallized in the monoclinic space group  $P2_1/c$ . The asymmetric unit consists of one 5-benzyloxytryptaminium cation, which is protonated at the amino group, and one chloride anion. The amino group makes three weak hydrogen bonds to three chloride anions (N1-H11 Cl21(x,1-y,-z): 3.1834(16) Å; N1-H12 Cl21(x,1/2-y,1/2+z): 3.2310(15); N1-H13 Cl21(x,y,1+z): 3.1470(15) Å).

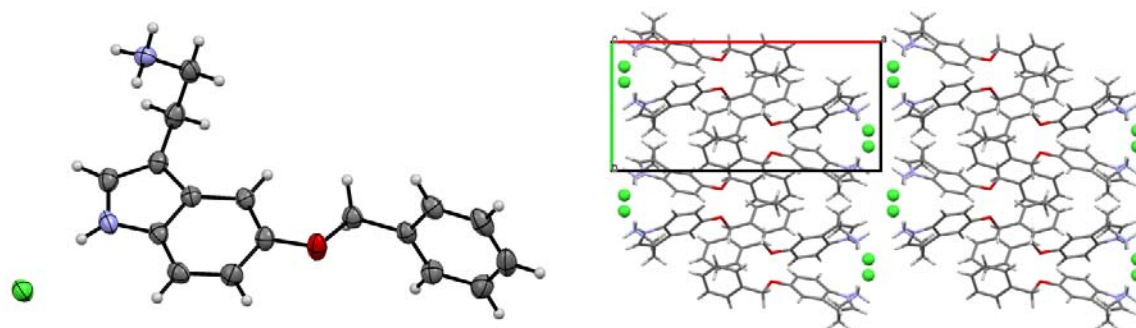

Supplementary Figure 4: Left: displacement ellipsoid representation of **[BaH]Cl**, ellipsoids are drawn at 50% probability. Right: packing diagram of **[BaH]Cl**.

### [5-benzyloxytryptaminium][iodide]

Crystalline material was obtained from several crystallization setups: in one case, the drop obtained by mixing 500 nl of a 2.65 M sodium iodide and 500 nl of a 90% saturated 5-benzyloxytryptamine hydrochloride solution was equilibrated against a reservoir of 2.65 M sodium iodide. In two other setups, half and quarter concentrations of iodide in drops and reservoirs respectively were used. All these



conditions gave crystals, but their quality was too low for structure determination by SCXRD. The crystal used for SCXRD was crystallized from a mixture of 20  $\mu\text{l}$  of 5.3 M sodium iodide in water, 20  $\mu\text{l}$  of a 90% saturated solution of 5-benzyloxytryptamine hydrochloride in water and 80  $\mu\text{l}$  acetone. The crystallization technique was slow evaporation. This complex crystallized in the monoclinic space group  $P2_1/c$ . The asymmetric unit consists of one 5-benzyloxytryptaminium cation, which is protonated at the amino group, and an iodide counterion. The amino group forms three hydrogen bonds to iodide ion (N1-H1 I21(-x,-1/2+y,1/2-z): 3.507(2)  $\text{\AA}$ ; N1-H12 I21: 3.562(2)  $\text{\AA}$ ; N1-H13 I21(x,3/2-y,1/2+z): 3.526(2)  $\text{\AA}$ ).

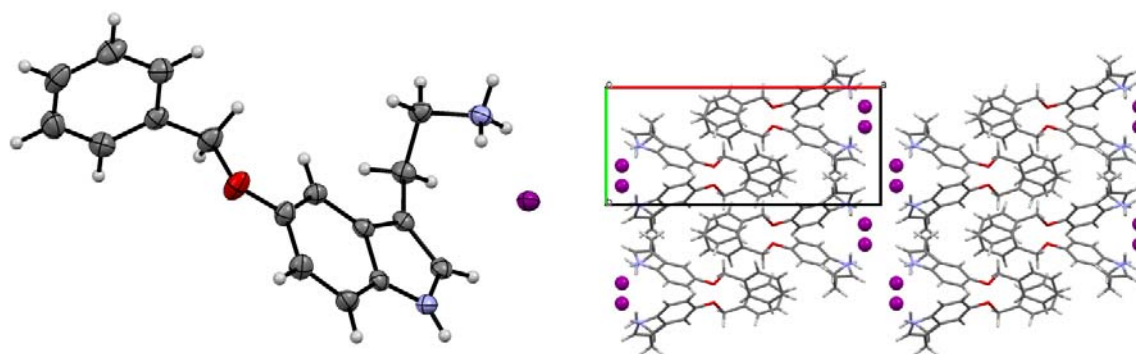

Supplementary Figure 5: Left: displacement ellipsoid representation of **[BaH]I**, ellipsoids are drawn at 50% probability. Right: packing diagram of **[BaH]I**.

### **[5-benzyloxytryptaminium][dihydrogen phosphate]**

The crystalline material, which was obtained directly from the screening, was of insufficient quality for structure determination by SCXRD. The setup was either a drop obtained by mixing 500 nl of a 4 M sodium dihydrogen phosphate solution and 500 nl of a 90% saturated 5-benzyloxytryptamine hydrochloride solution that was equilibrated against a reservoir of 4 M sodium dihydrogen phosphate, or the same setup with half the sodium dihydrogen phosphate concentration. The crystal used for SCXRD was crystallized from a mixture of 20  $\mu\text{l}$  of 4 M sodium dihydrogen phosphate in water, 20  $\mu\text{l}$  of a 90% saturated solution of 5-benzyloxytryptamine hydrochloride in water and 80  $\mu\text{l}$  acetone. The crystallization technique was slow evaporation. This complex crystallized in the monoclinic space group  $P2_1/c$ . The asymmetric unit consists of one 5-benzyloxytryptaminium cation, which is protonated at the amino group, and a dihydrogen phosphate anion. The amino group forms three hydrogen bonds to oxygen atoms of dihydrogen phosphate (N1-H11 O22(x,3/2-y,-1/2+z): 3.2040(15)  $\text{\AA}$ ; N1-H13 O22: 2.9143(14)  $\text{\AA}$ ; N1-H12 O24(2-x,1-y,1-z): 2.7683(15)  $\text{\AA}$ ). The nitrogen of the indole creates a hydrogen bond to the oxygen atom of the dihydrogen phosphate (N6-H61 O22: 2.9143(14)  $\text{\AA}$ ).

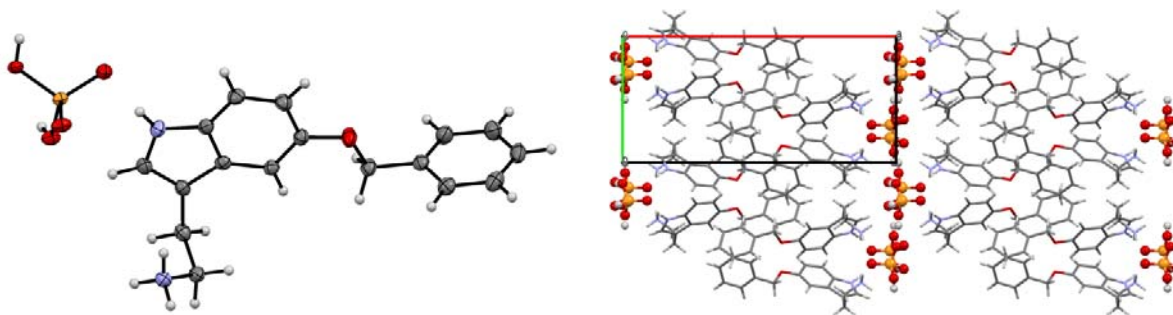

Supplementary Figure 6: Left: displacement ellipsoid representation of  $[\text{BaH}]\text{H}_2\text{PO}_4$ , ellipsoids are drawn at 50% probability. Right: packing diagram of  $[\text{BaH}]\text{H}_2\text{PO}_4$ .

**$[\text{5-benzyloxytryptaminium}]_2[\text{antimony L-tartrate}] \cdot 2(\text{H}_2\text{O})$**

This crystal arose in a drop obtained by mixing 500 nl of a 54 mM potassium antimony L-tartrate and 500 nl of a 90% saturated 5-benzyloxytryptamine hydrochloride solution, and equilibrating against a reservoir of 54 mM potassium antimony L-tartrate. This complex crystallized in the monoclinic space group  $C2$ . The asymmetric unit consists of half an antimony L-tartrate anion, one water molecule and one 5-benzyloxytryptaminium cation, which is protonated at the amino group. The antimony L-tartrate lies on a two-fold axis. The amino group makes three hydrogen bonds to the antimony L-tartrate (N1-H12 O24: 2.960(6) Å, N1-H13 O25(x,1+y,z): 2.983(5) Å and N1-H13 O31(x,1+y,z): 3.003(6) Å).

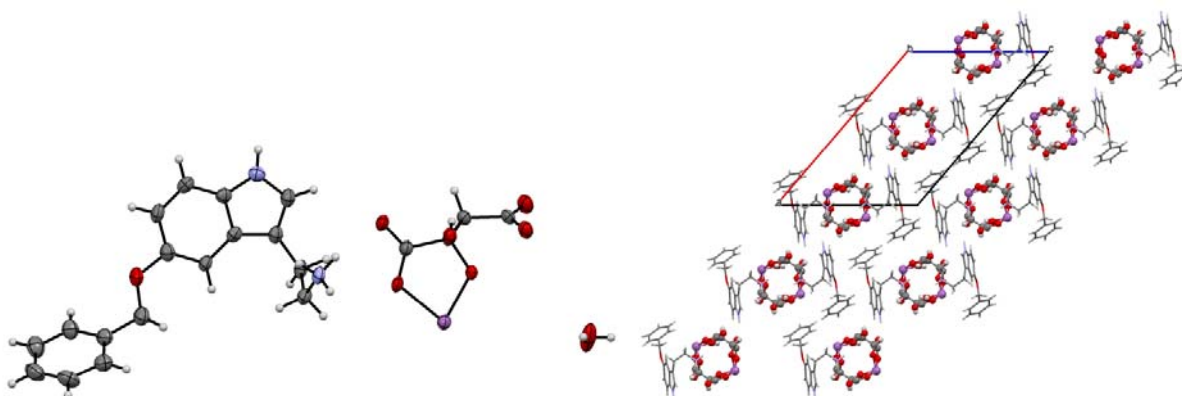

Supplementary Figure 7: Left: displacement ellipsoid representation of  $[\text{BaH}]_2[\text{antimony L-tartrate}] \cdot 2(\text{H}_2\text{O})$ , ellipsoids are drawn at 50% probability, for clarity only the asymmetric unit is shown. Right: packing diagram of  $[\text{BaH}]_2[\text{antimony L-tartrate}] \cdot 2(\text{H}_2\text{O})$ .

**[5-benzyloxytryptaminium]<sub>2</sub>[L-tartrate]·3.35(H<sub>2</sub>O)**

This crystal was isolated from a drop obtained by mixing of 500 nl of a 1.4 M sodium potassium L-tartrate and 500 nl of a 90% saturated 5-benzyloxytryptamine hydrochloride solution, and equilibrating against a reservoir of 1.4 M sodium potassium L-tartrate. The salt crystallized in the chiral space group  $P2_1$ . In the asymmetric unit, there are two 5-benzyloxytryptaminium cations, one tartrate dianion and 3.35 water molecules. The ethylammonium group of one cation is disordered in a ratio of 70:30. The non-disordered ammonium group creates two hydrogen bonds to two carboxylate groups and one fully occupied water molecule. The disordered ammonium group forms two hydrogen bonds to two alcohol groups of one tartrate and one fully occupied water molecule. Because of the disorder, the hydrogen bonding pattern is not discussed in further detail.

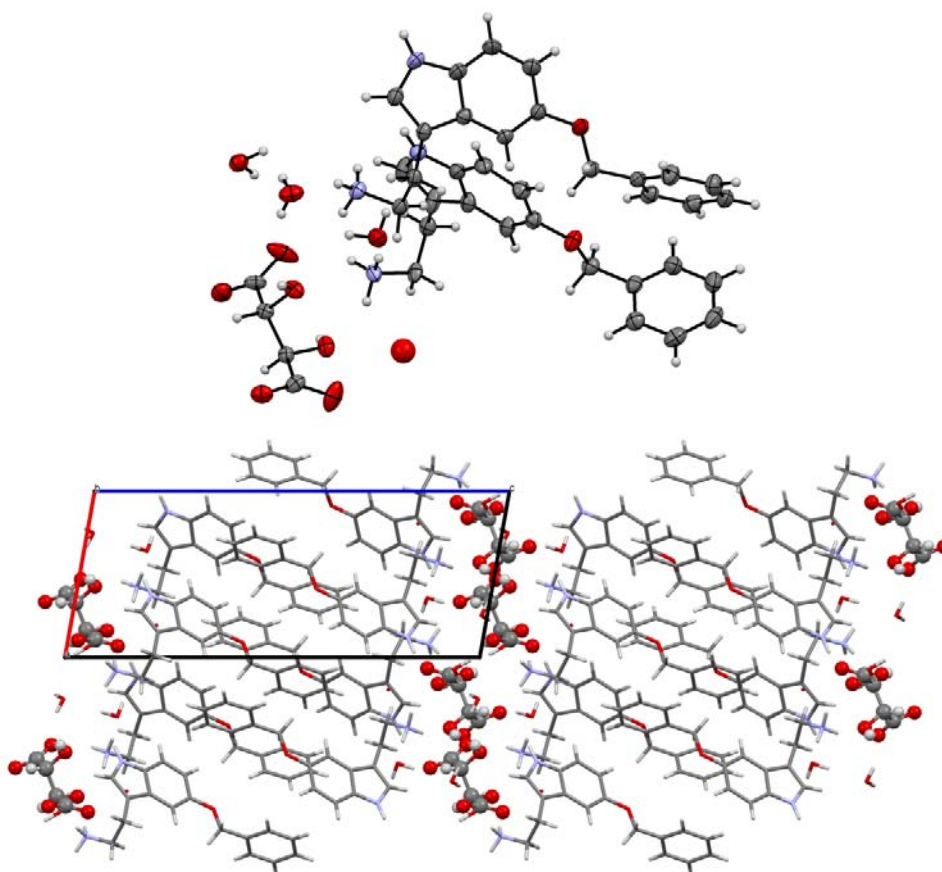

Supplementary Figure 8: Top: displacement ellipsoid representation of  $[\text{BaH}]_2[\text{L-tartrate}] \cdot 3.35(\text{H}_2\text{O})$ , ellipsoids are drawn at 50% probability. Only the major conformer of the disordered ethylammonium group is shown for clarity. Below: packing diagram of  $[\text{BaH}]_2[\text{L-tartrate}] \cdot 3.35(\text{H}_2\text{O})$ .

**[5-benzyloxytryptaminium]<sub>2</sub>[oxalate]·2(H<sub>2</sub>O)**

This crystal was isolated from a drop obtained by mixing of 500 nl of a 140 mM disodium oxalate and 500 nl of a 90% saturated 5-benzyloxytryptamine hydrochloride solution, and equilibrating against a reservoir of 140 mM disodium oxalate. This complex crystallized in the monoclinic space group  $P2_1$ . Refinement in  $P2_1/c$  yielded a model with a very high R value and high residual electron densities at irregular positions, hence, the final refinement was carried out in the non-isomorphic subgroup  $P2_1$ . The asymmetric unit consists of two 5-benzyloxytryptaminium cations, which are protonated at the amino position, one oxalate anion and two water molecules. The two water molecules as well as the oxalate anion are disordered in a ratio of 88:12. Both amino groups form 3 hydrogen bonds. The following discussion concentrates on the major component of the disorder: one ammonium (N1) group binds via two hydrogen bonds to two oxygen atoms of the oxalate (N1-H11 O43(-1+x,y,z): 2.718(2) Å and N1-H11 O41(-x,1/2+y,1-z): 2.801(3) Å) and one to water molecule (N1-H11 O47(-x,-1/2+y,1-z): 2.974(2) Å). The second ammonium (N21) makes one hydrogen bond to the oxygen atom of the oxalate (N21-H211 O45 2.926(3) Å) and to two water molecules (N21-H211 O46(-x,1/2+y,1-z): 2.800(2) Å and N21-H211 O48: 2.860(3) Å). One indole group forms a hydrogen bond to the oxygen atom of the oxalate (N6-H61 O43 2.906(2) Å). The second indole group creates a hydrogen bond to a water molecule (N26-H261 O47(1-x,-1/2+y,1-z): 2.976(2) Å).

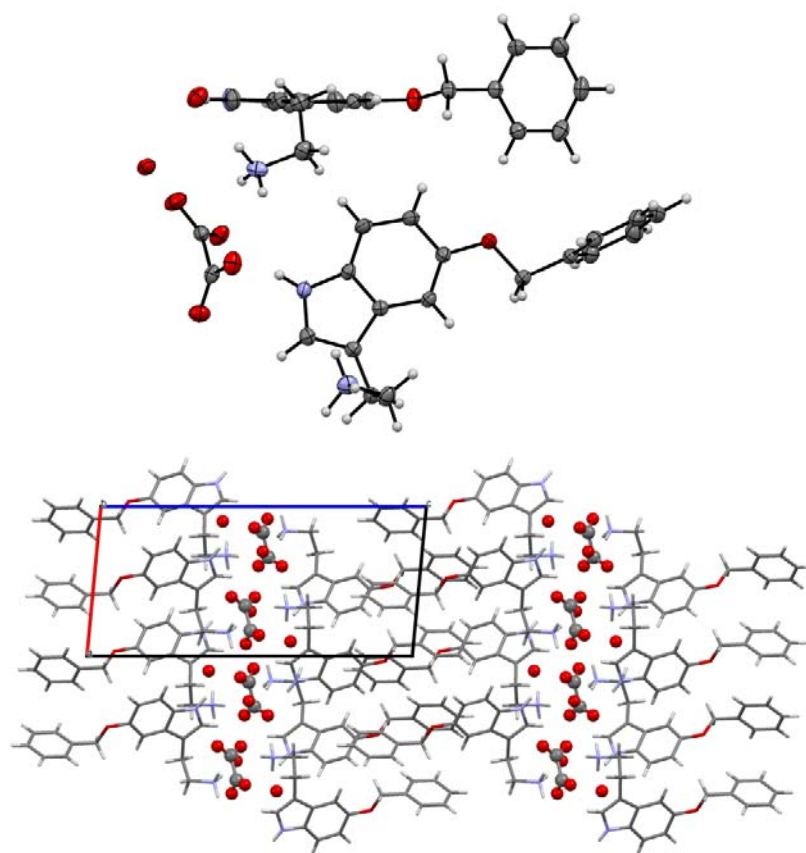

Supplementary Figure 9: Top: displacement ellipsoid representation of  $[\text{BaH}]_2[\text{oxalate}] \cdot 2(\text{H}_2\text{O})$ , ellipsoids are drawn at 50% probability. Only the major components of the disordered moieties are shown for clarity. Below: packing diagram of  $[\text{BaH}]_2[\text{oxalate}] \cdot 2(\text{H}_2\text{O})$ .

**[5-benzyloxytryptaminium]<sub>2</sub>[sulfate]·2(H<sub>2</sub>O)**

This crystal arose in a drop obtained by mixing of 500 nl of a 1 M sodium sulfate and 500 nl of a 90% saturated 5-benzyloxytryptamine hydrochloride solution, and equilibrating against a reservoir of 1 M sodium sulfate. The achiral salt crystallized in the chiral space group  $P2_1$  with two 5-benzyloxytryptaminium cations, one sulfate anion and two water molecules in the asymmetric unit. The two 5-benzyloxytryptaminium cations are protonated at the amino group. These aminium groups form multiple hydrogen bonds to two oxygen atoms of sulfate anions (N1-H11 O44(1-x,1/2+y,1-z): 2.769(3) Å; N1-H13 O45: 2.784(3) Å and N21-H211 O42 (1+x,y,z): 2.756(3) Å; N21-H213 O43(1-x,-1/2+y,1-z): 2.756(3) Å). Finally, one indole group forms a hydrogen bond to oxygen of sulfate ion (N26-H261 O42 2.834(3) Å).

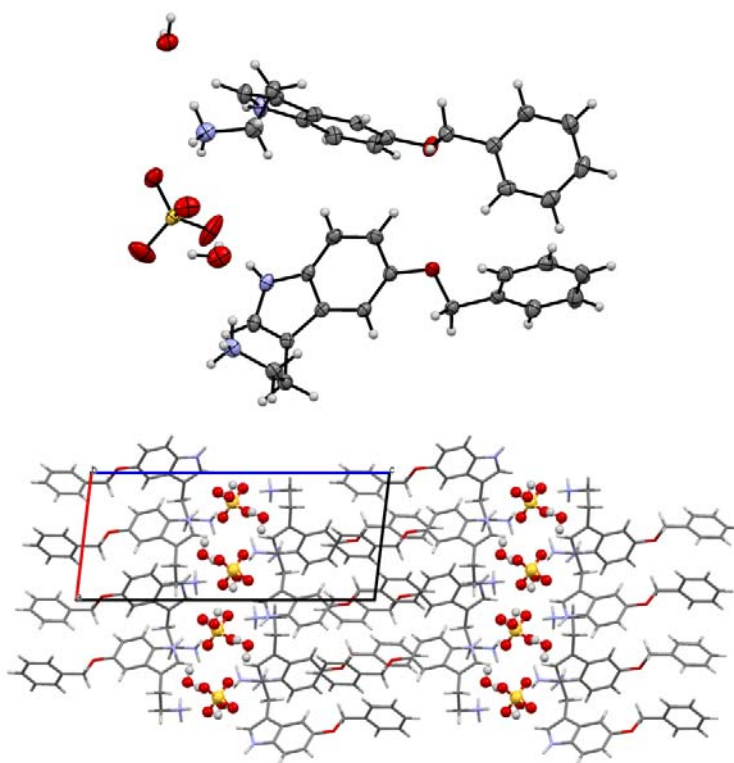

Supplementary Figure 10: Top: displacement ellipsoid representation of **[BaH]<sub>2</sub>[sulfate]·2(H<sub>2</sub>O)**, ellipsoids are drawn at 50% probability. Below: packing diagram of **[BaH]<sub>2</sub>[sulfate]·2(H<sub>2</sub>O)**.

**[5-benzyloxytryptaminium][tetrafluoroborate]**

The single crystal was isolated from a drop obtained by mixing 500 nl of a 4 M sodium tetrafluoroborate and 500 nl of a 90% saturated 5-benzyloxytryptamine hydrochloride solution, and equilibrating against a reservoir of 4 M sodium tetrafluoroborate. Crystals of equal quality could be obtained by taking 100 nl of both solutions instead. This complex crystallized in the monoclinic space group  $P2_1/c$ . The asymmetric unit consists of one 5-benzyloxytryptaminium cation, which is protonated at the amino group, and one tetrafluoroborate anion. This amino group binds to 4 fluorine atoms thus forming 2 two-centred hydrogen bonds and a combination of a three-centred hydrogen bond with a bifurcated hydrogen bond (N1-H11 F25(2-x,1-y,1-z): 2.9192(14) Å; N1-H12 F22(x,3/2-y,1/2+z): 2.8544(15) Å; N1-H12 F25: 2.9182(14) Å; N1-H13 F24(2-x,-1/2+y,3/2-z): 2.8619(14) Å).

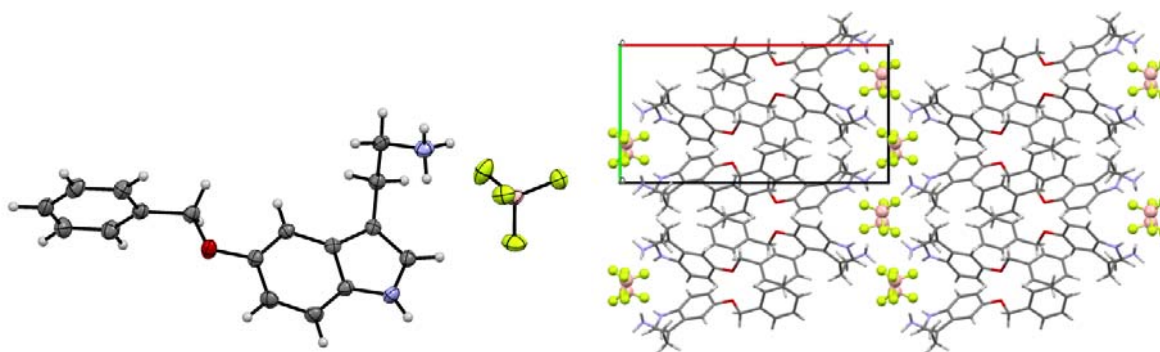

Supplementary Figure 11: Left: displacement ellipsoid representation of **[BaH][tetrafluoroborate]**, ellipsoids are drawn at 50% probability. Right: packing diagram of **[BaH][tetrafluoroborate]**.



### **[5-benzyloxytryptaminium][thiocyanate]**

This crystal was isolated from a drop obtained by mixing 500 nl of a 3.5 M potassium thiocyanate solution and 500 nl of a 90% saturated 5-benzyloxytryptamine hydrochloride solution equilibrating against a reservoir of 3.5 M potassium thiocyanate. This complex crystallized in the monoclinic space group  $P2_1/c$ . The asymmetric unit consists of one 5-benzyloxytryptaminium cation, which is protonated at the amino group, and a thiocyanate anion. The amino group forms a hydrogen bond to the nitrogen atom of the thiocyanate ion (N1-H12 N21(x, y, z-1): 2.7857(19) Å).

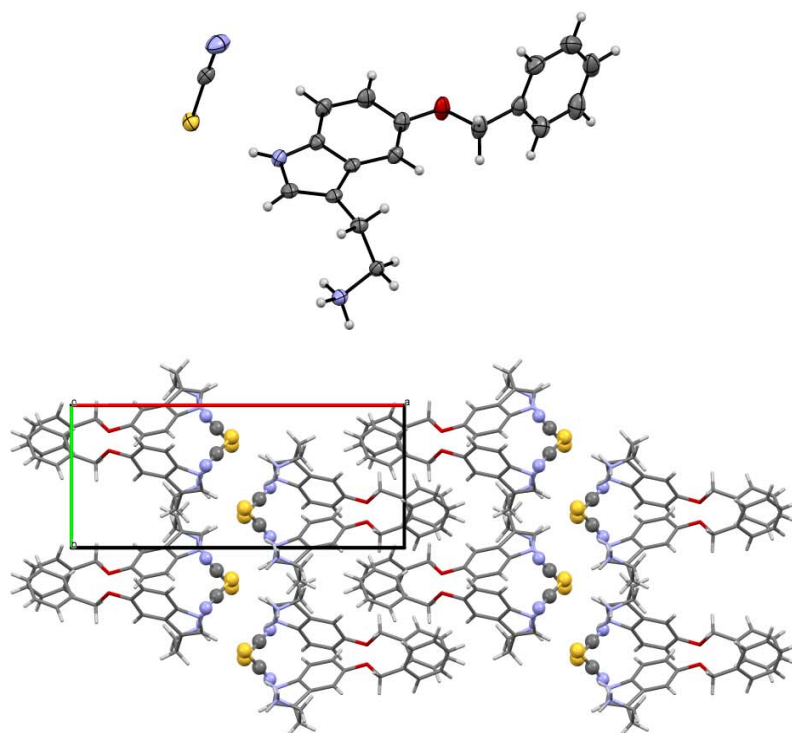

Supplementary Figure 12: Top: displacement ellipsoid representation of **[BaH][thiocyanate]**, ellipsoids are drawn at 50% probability. Below: packing diagram of **[BaH][thiocyanate]**.

The crystal structures of **[5-benzyloxytryptaminium]<sub>2</sub>[succinate]** and **[5-benzyloxytryptaminium][bromide]** will be described in a later publication.



### [(*R,S*)-carnitinenitrile][tetraphenylborate]

Crystalline material was obtained from the screening in drops containing either 200 mM sodium tetraphenylborate and 2.82 M (*R,S*)-carnitinenitrile chloride equilibrating against a reservoir of 400 mM sodium tetraphenylborate, or 100 mM sodium tetraphenylborate and 2.82 M (*R,S*)-carnitinenitrile chloride equilibrating against a reservoir of 200 mM sodium tetraphenylborate. The quality of the crystals was too low for structure determination by SCXRD. The measured crystal was obtained by recrystallization in acetone as follows: (*R,S*)-carnitinenitrile tetraphenylborate precipitated immediately after mixing a stock solution of sodium tetraphenylborate (2.82 M, 50  $\mu$ l) and the stock solution of (*R,S*)-carnitinenitrile chloride (50  $\mu$ l). This precipitate was filtered through a filter paper and dried on the very filter paper at room temperature. The dry powder material was dissolved in acetone till a clear solution was observed (around 100  $\mu$ l acetone). The solution was evaporated at room temperature from an open vial. This complex crystallized in the monoclinic space group  $P2_1/n$ . The asymmetric unit consists of one carnitinenitrile cation and one tetraphenylborate anion. The molecule of carnitinenitrile is disordered and both enantiomers are almost in same position in a ratio of 22% *R*-enantiomer and 78% *S*-enantiomer. As the space group is centrosymmetric, no enantiomeric enrichment was observed. There is no hydrogen bonding present, as the hydroxy group of carnitinenitrile has no close acceptor.

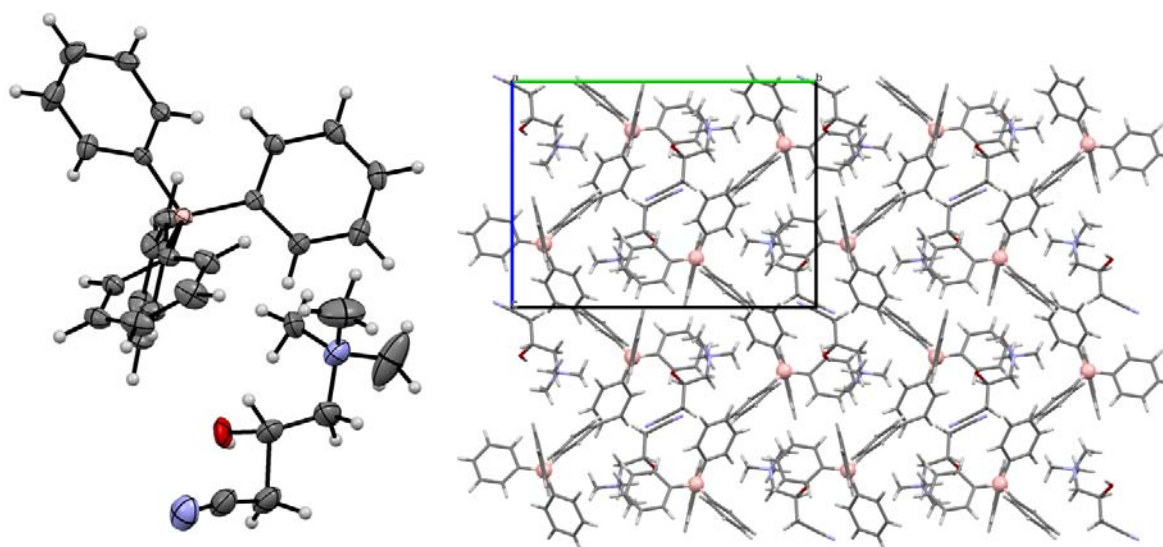

Supplementary Figure 13: Left: displacement ellipsoid representation of [(*R,S*)-carnitinenitrile][tetraphenylborate], ellipsoids are drawn at 50% probability. Only the major conformer of the disordered hydroxy part is shown for clarity. Right: packing diagram of [(*R,S*)-carnitinenitrile][tetraphenylborate].

### **[(*R*)-carnitinenitrile][tetraphenylborate]**

Crystalline material was obtained from the screening in drops containing either 200 mM sodium tetraphenylborate and 2.82 M (*R*)-carnitinenitrile chloride equilibrating against a reservoir of 400 mM sodium tetraphenylborate, or 100 mM sodium tetraphenylborate and 2.82 M (*R*)-carnitinenitrile chloride equilibrating against a reservoir of 200 mM sodium tetraphenylborate. The quality of the crystals was too low for structure determination by SCXRD. The crystal used for SCXRD was crystallized on a petri dish by directly mixing two drops ethylene glycol solutions of (*R*)-carnitinenitrile chloride (10  $\mu$ l, 45% of saturation) and sodium tetraphenylborate (10  $\mu$ l, 25% of saturation). This mixture started to crystallize immediately and produced a good quality crystal. This complex crystallized in the orthorhombic space group  $P 2_12_12_1$ . The asymmetric unit consists of one (*R*)-carnitinenitrile cation and a tetraphenylborate anion. There is no hydrogen bond present, as the hydroxy group of carnitinenitrile has no close acceptor.

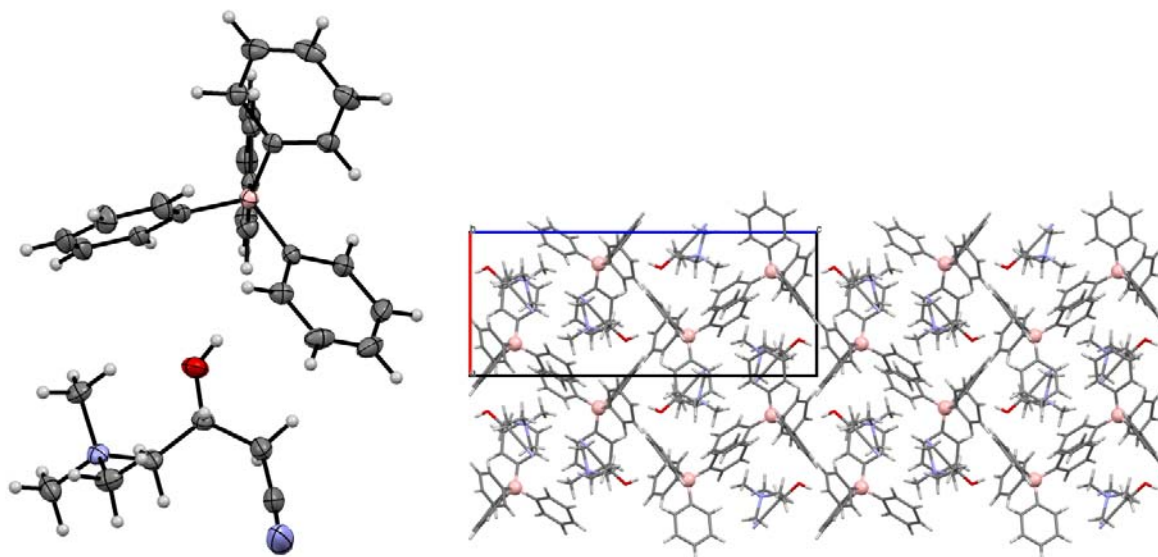

Supplementary Figure 14: Left: displacement ellipsoid representation of **[(*R*)-carnitinenitrile][tetraphenylborate]**, ellipsoids are drawn at 50% probability. Right: packing diagram of **[(*R*)-carnitinenitrile][tetraphenylborate]**.

**2-(3-(3,5-bis(trifluoromethyl)phenyl)thioureido)-N,N,N-trimethylethanammonium bromide [Cat]Br**

This crystal grew in a drop, which was obtained by mixing 500 nl 4 M sodium bromide and 500 nl of a 90% saturated aqueous [Cat]I solution, and equilibrating against a reservoir of 4 M sodium bromide. This complex crystallized in the monoclinic space group  $P2_1/c$ . The asymmetric unit consists of two **Cat** cations and two bromide anions. The amino groups of the thiourea form weak hydrogen bonds to the bromides (N3-H31 Br62: 3.4606(13) Å; N10-H101 Br62: 3.3343(13) Å; N33-H331 Br61: 3.4263(13) Å and N40-H401 Br61: 3.3701(14) Å). One trifluoromethyl group is disordered in each **Cat** cation.

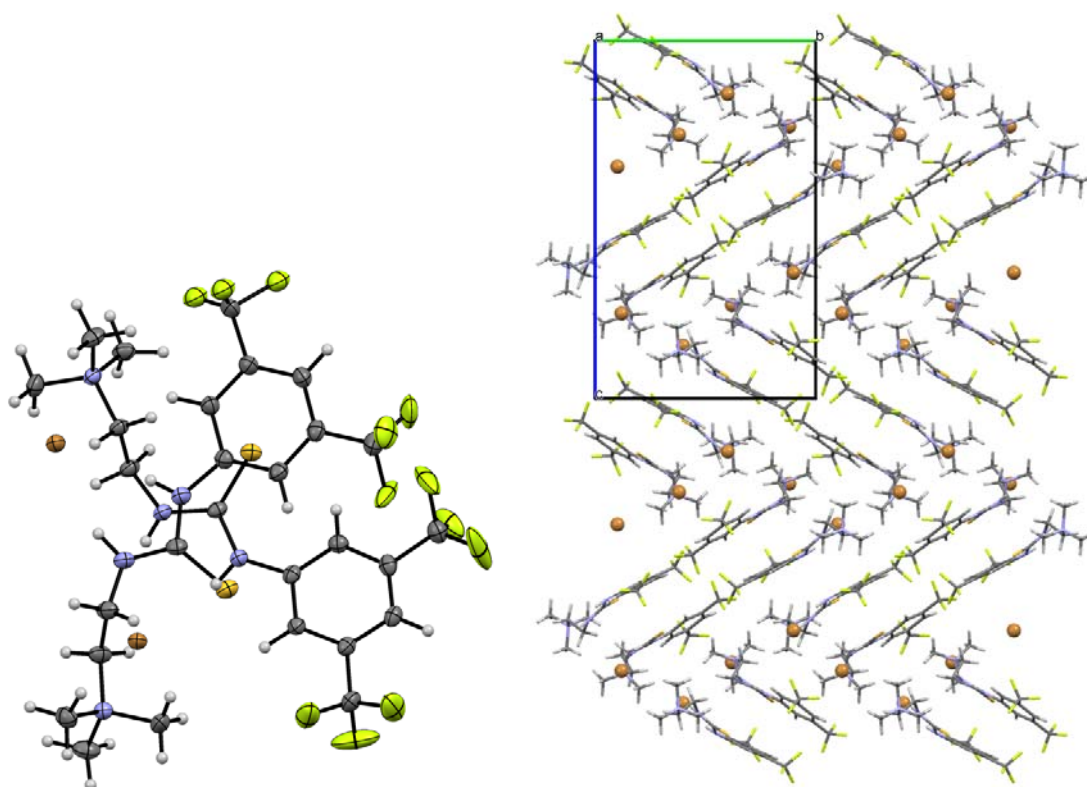

Supplementary Figure 15: Left: displacement ellipsoid representation of [Cat][bromide], ellipsoids are drawn at 50% probability, for clarity only the major component of the disordered trifluoromethyl groups unit is shown. Right: packing diagram of [Cat][bromide].

**2-(3-(3,5-bis(trifluoromethyl)phenyl)thioureido)-N,N,N-trimethylethanammonium-potassium bis-(hexafluorophosphate) [Cat][K][PF<sub>6</sub>]<sub>2</sub>**

This single crystal was directly picked from a drop obtained by mixing 500 nl 240 mM potassium hexafluorophosphate and 500 nl of a 90% saturated aqueous [Cat]I solution, and equilibrating against a reservoir of 240 mM potassium hexafluorophosphate. This complex crystallized in the monoclinic space group  $P2_1/c$ . The asymmetric unit consists of one **Cat** cation, one potassium cation and two hexafluorophosphate anions. Therefore the structure is actually a double salt. The amino groups of thiourea form hydrogen bonds with sulfur of thiourea (N3-H31 S1(x,3/2-y,-1/2+z): 3.488(2) Å and N10-H101 S1(x,3/2-y,-1/2+z): 3.398(2) Å). The potassium cation is bonded to 9 fluorine atoms. Such arrangements of  $K[PF_6]_4^{3-}$  have been reported previously<sup>10-12</sup>.

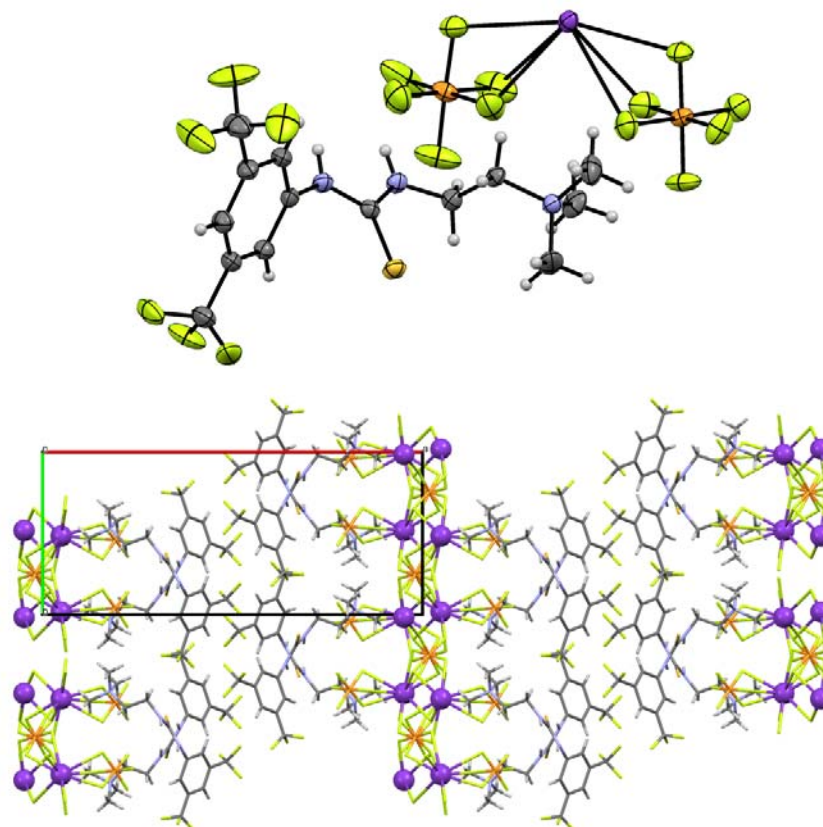

Supplementary Figure 16: Top: displacement ellipsoid representation of [Cat][potassium][hexafluorophosphate]<sub>2</sub>, ellipsoids are drawn at 50% probability. Below: packing diagram of [Cat][potassium][hexafluorophosphate]<sub>2</sub>.

**[(1*S*,2*R*)-(+)-Ephedrinium][chloride]**

This single crystal was grown in a drop obtained by mixing 100 nl of a 3.0 M sodium chloride solution and 100 nl of a 1.12 M (1*S*,2*R*)-(+)-ephedrine hydrochloride solution, and equilibrating against a reservoir of 3.0 M sodium chloride. The complex crystallized in the monoclinic, chiral space group  $P2_1$ , with the unit cell constants  $a = 7.2565(3)$  Å,  $b = 6.1232(3)$  Å,  $c = 12.5570(6)$  Å and  $\beta = 102.256(5)^\circ$ . The structure of the other enantiomer **[(1*R*,2*S*)-(-)-ephedrinium][chloride]** ( $a = 7.2557(3)$  Å,  $b = 6.1228(3)$  Å,  $c = 12.5486(6)$  Å and  $\beta = 102.223(2)^\circ$ ) was previously reported<sup>13</sup>.

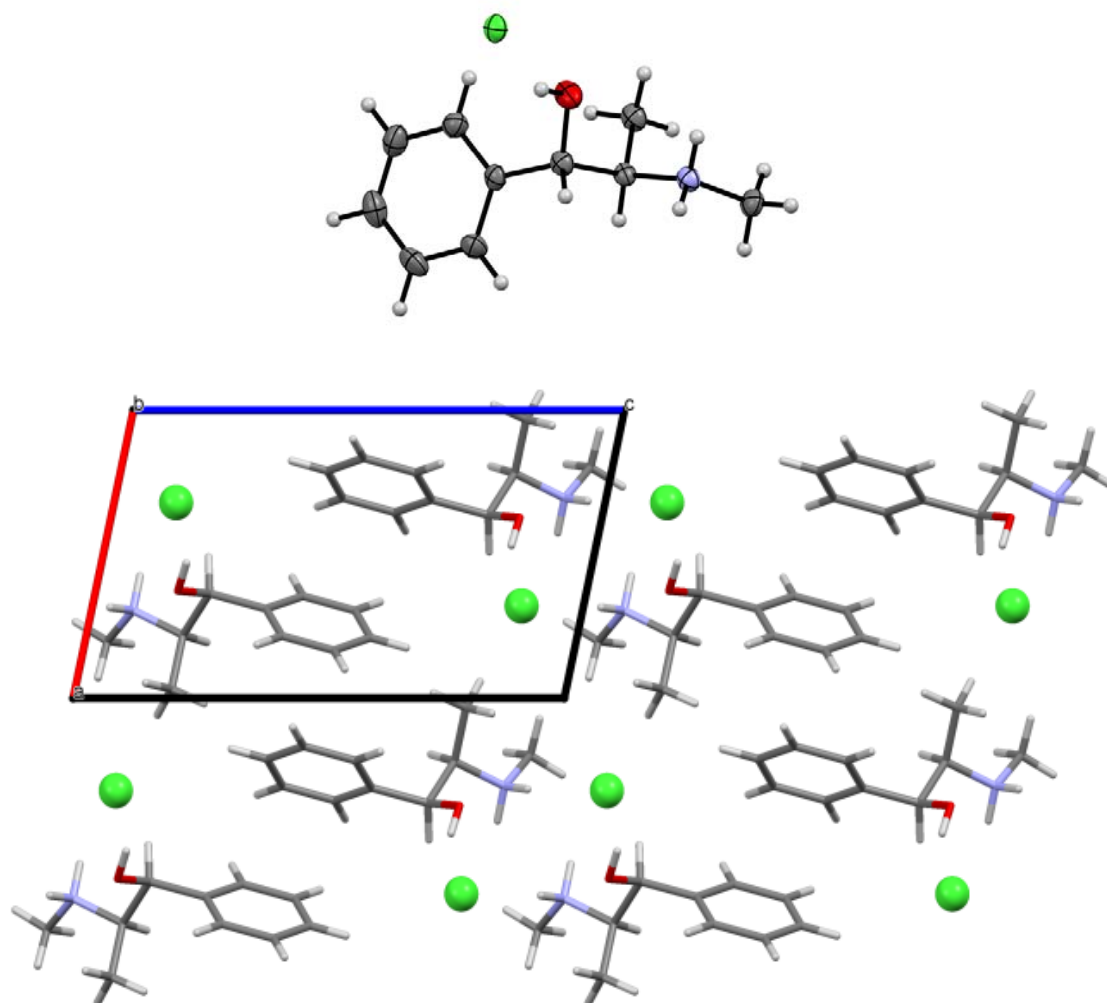

Supplementary Figure 17: Top: displacement ellipsoid representation of **[(1*S*,2*R*)-(+)-ephedrinium][chloride]**, ellipsoids are drawn at 50% probability. Below: packing diagram of **[(1*S*,2*R*)-(+)-ephedrinium][chloride]**.

### **[(1*S*,2*R*)-Ephedrinium][bromide]**

This single crystal was grown in a drop obtained by mixing 100 nl of a 4.0 M sodium bromide solution and 100 nl of a 1.12 M (1*S*,2*R*)-(+)-ephedrine hydrochloride solution, and equilibrating against a reservoir of 3.0 M sodium bromide. The complex crystallized in the monoclinic, chiral space group  $P2_1$ , with the unit cell constants  $a = 7.4467(2) \text{ \AA}$ ,  $b = 6.20961(16) \text{ \AA}$ ,  $c = 12.5863(4) \text{ \AA}$  and  $\beta = 101.176(3)^\circ$ . The cell constants of the opposite enantiomer [(1*R*,2*S*)-ephedrinium][bromide] at room temperature were previously reported as follows:  $a = 12.74 \text{ \AA}$ ,  $b = 6.20 \text{ \AA}$ ,  $c = 7.62 \text{ \AA}$  and  $\beta = 100.80^\circ$ <sup>14</sup>. The structure is isostructural compared with the chloride salt (see the previous structure and ref.<sup>13</sup>).

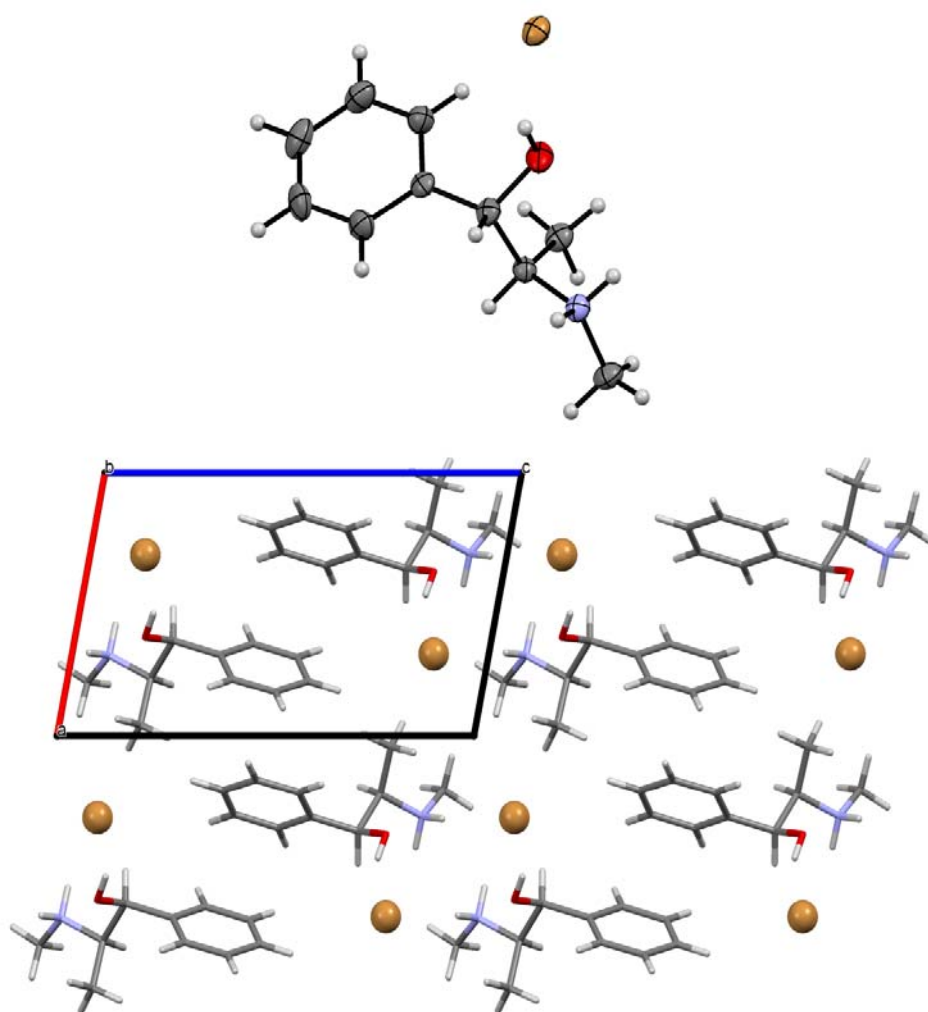

Supplementary Figure 18: Top: displacement ellipsoid representation of [(1*S*,2*R*)-ephedrinium][bromide], ellipsoids are drawn at 50% probability. Below: packing diagram of [(1*S*,2*R*)-ephedrinium][bromide].



### **[(1*S*,2*R*)-Ephedrinium][iodide], polymorph II**

Crystals were obtained in a drop containing 2.67 M sodium iodide and 0.31 M (1*S*,2*R*)-(+)-ephedrine hydrochloride that was equilibrated by vapour diffusion against a reservoir of 5.34 M sodium iodide at 4°C. The complex crystallized in the monoclinic, chiral space group  $P2_1$ , with the unit cell constants  $a = 5.40542(18)$  Å,  $b = 6.94898(18)$  Å,  $c = 16.0701(4)$  Å and  $\beta = 95.864(3)^\circ$ . This new crystal form is a polymorph of the previously reported orthorhombic form of the opposite enantiomer **[(1*R*,2*S*)-ephedrinium][iodide]** ( $a = 25.66$  Å,  $b = 7.33$  Å,  $c = 19.14$  Å), which was published in 1933<sup>14</sup>. This orthorhombic crystal form was originally prepared in 1909 by evaporation of an ethanolic solution of **[(1*R*,2*S*)-ephedrinium][iodide]**<sup>15</sup>.

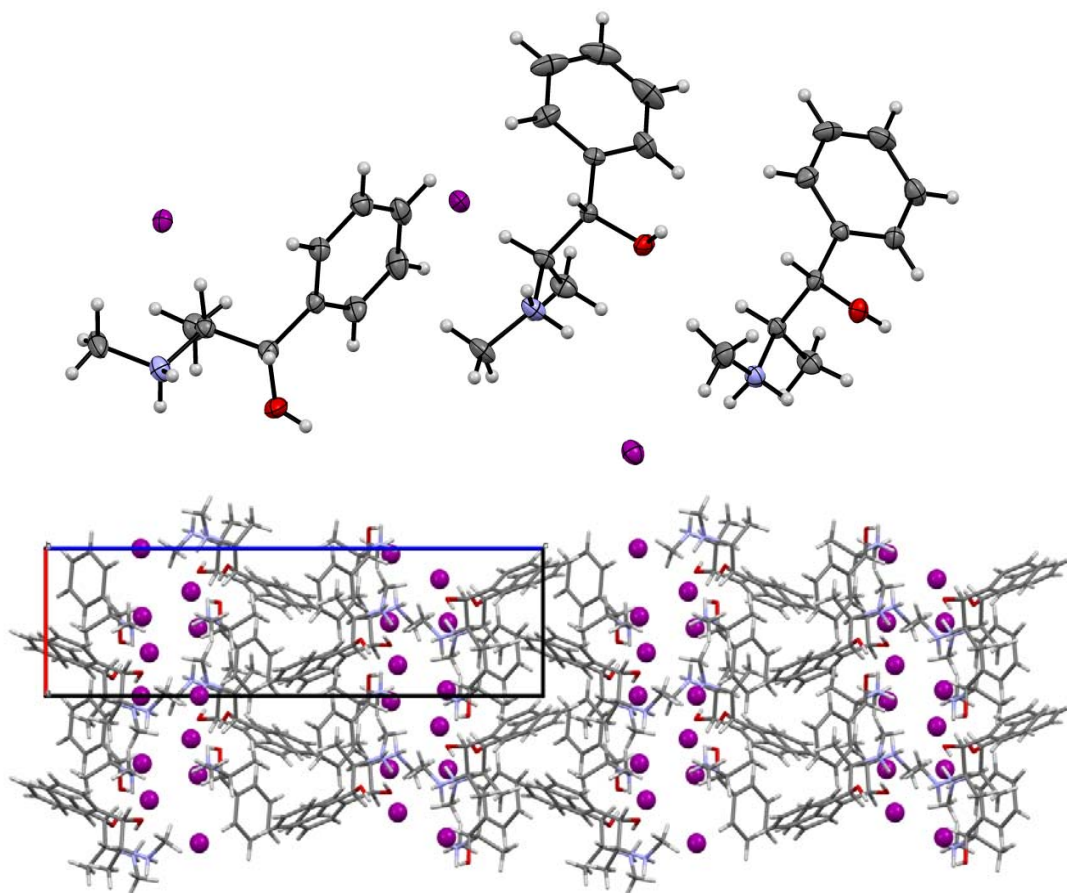

Supplementary Figure 19: Top: displacement ellipsoid representation of **[(1*S*,2*R*)-ephedrinium][iodide]**, polymorph II, ellipsoids are drawn at 50% probability. Below: packing diagram of **[(1*S*,2*R*)-ephedrinium][iodide]**, polymorph II.

**[(1*S*,2*R*)-Ephedrinium][iodide], polymorph I**

Crystals of polymorph I were obtained by mixing 1 ml of a 0.62 M solution of (1*S*,2*R*)-(+)-ephedrine hydrochloride and 1 ml of a 5.34 M solution of sodium iodide. Large crystals grew overnight (Supplementary Fig. 20). A suitable single crystal was chosen for the X-ray diffraction experiment. The unit cell was essentially equal to that found for the opposite enantiomer, which had already been reported in 1933 (see also the previous discussion of the other polymorph) <sup>14</sup>. The complex crystallized in the orthorhombic, chiral space group  $P2_12_12_1$  and contained three molecules in the asymmetric unit.

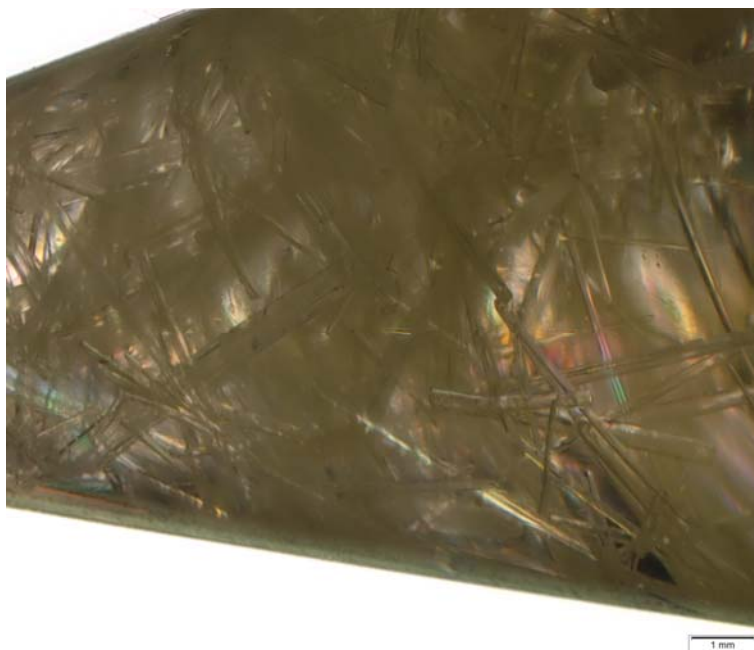

Supplementary Figure 20: Microscope picture of crystals grown in a 15 ml polypropylene centrifuge tube by mixing 1 ml of a 0.62 M solution of (1*S*,2*R*)-(+)-ephedrine hydrochloride and 1 ml of a 5.34 M solution of sodium iodide. The scale bar corresponds to 1 mm.



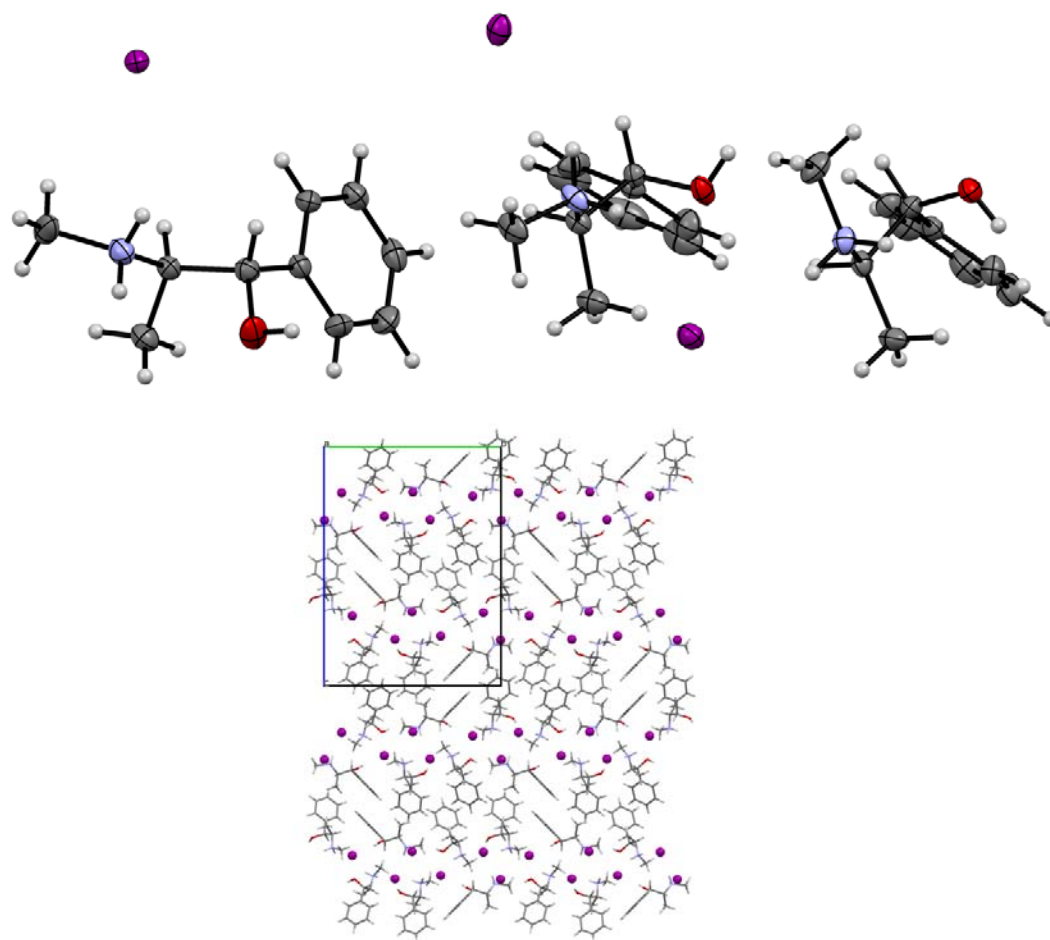

Supplementary Figure 21: Top: displacement ellipsoid representation of the asymmetric unit of [(1*S*,2*R*)-ephedrinium][iodide], polymorph I, ellipsoids are drawn at 50% probability. Below: packing diagram of [(1*S*,2*R*)-ephedrinium][iodide], polymorph I.

### **[(1*S*,2*R*)-Ephedrinium]<sub>2</sub>[oxalate]**

Crystals were obtained from a drop containing 0.069 M disodium oxalate and 0.155 M (1*S*,2*R*)-(+)-ephedrine hydrochloride that was equilibrated by vapour diffusion against a reservoir of 0.138 M disodium oxalate. The crystals were of sufficient size and excellent quality that they could even be measured with the relatively weak molybdenum X-ray radiation. The complex crystallized in the monoclinic, chiral space group *C*2. The asymmetric unit contains one protonated ephedrine cation and one half of an oxalate anion. Because of the used X-ray wavelength and the presence of exclusively light elements, the Flack *x* and the Parson's *z* parameters calculated by *Platon*<sup>16</sup> were unreliable (0.2(2) and 0.15(19) respectively), however using the Hooft method<sup>17</sup> and assuming no racemic twinning gave a very low probability *p*2(wrong) of  $1.2 \cdot 10^{-4}$  that the model assumes the wrong enantiomer. As the program *Platon* only calculates *p*2(right), *p*2(wrong) was calculated with the formula given at <http://www.absolute-structure.com/faq>:  $p2(\text{wrong}) = [p3(\text{wrong}) / (p3(\text{wrong}) + p3(\text{right}))]$ . The protonated secondary amine forms two hydrogen bonds (N1-H11 O11: 2.7536(14) Å and N1-H12 O11(-*x*+1/2,*y*-1/2,-*z*+1): 2.8233(14) Å) and the alcohol one hydrogen bond (O1-H1A O1(-*x*,*y*-1,-*z*+1): 2.6730(13) Å).

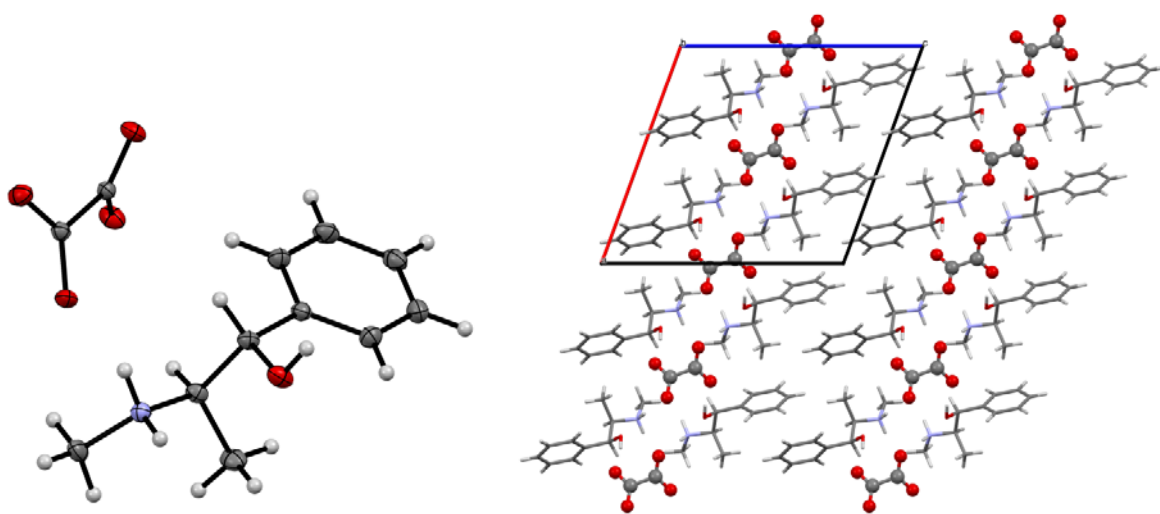

Supplementary Figure 22: Left: displacement ellipsoid representation of **[(1*S*,2*R*)-ephedrinium]<sub>2</sub>[oxalate]**, ellipsoids are drawn at 50% probability. One protonated ephedrine cation and a whole oxalate anion are shown. Right: packing diagram of **[(1*S*,2*R*)-ephedrinium]<sub>2</sub>[oxalate]**.

**[(1*S*,2*R*)-Ephedrinium][thiocyanate]**

This single crystal was directly picked from a drop obtained by mixing 100 nl of a 1.75 M potassium thiocyanate solution and 100 nl of a 1.12 M (1*S*,2*R*)-(+)-ephedrine hydrochloride solution, and equilibrating against a reservoir of 1.75 M potassium thiocyanate. The complex crystallized in the orthorhombic, chiral space group  $P2_12_12_1$ , with the unit cell constants  $a = 6.09862(6)$  Å,  $b = 7.52704(9)$  Å and  $c = 27.3811(3)$ Å.

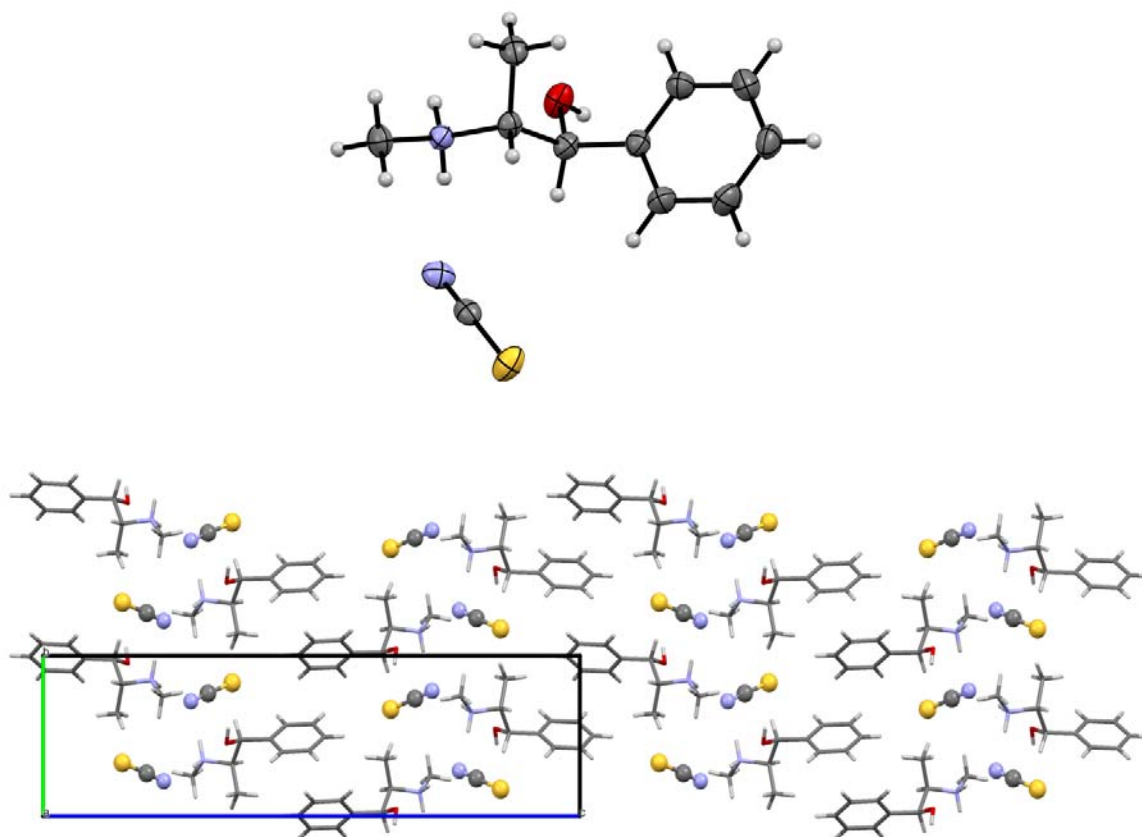

Supplementary Figure 23: Top: displacement ellipsoid representation of [(1*S*,2*R*)-ephedrinium][thiocyanate], ellipsoids are drawn at 50% probability. Below: packing diagram of [(1*S*,2*R*)-ephedrinium][thiocyanate].

### **[Trazodonium][iodide]**

Crystals of the iodide salt were grown in a drop obtained by mixing 500 nl 5.34 M NaI and 500 nl of a 90% saturated aqueous trazodone hydrochloride solution, and equilibrating against a reservoir of 5.34 M NaI. The asymmetric unit contains one protonated trazodone cation and an iodide anion. The trazodone cation is monoprotonated at the piperazine amine atom that is connected solely to aliphatic carbon atoms. This ammonium group forms a weak hydrogen bond to the iodide anion (N14-H14A I31: 3.6541(15) Å).

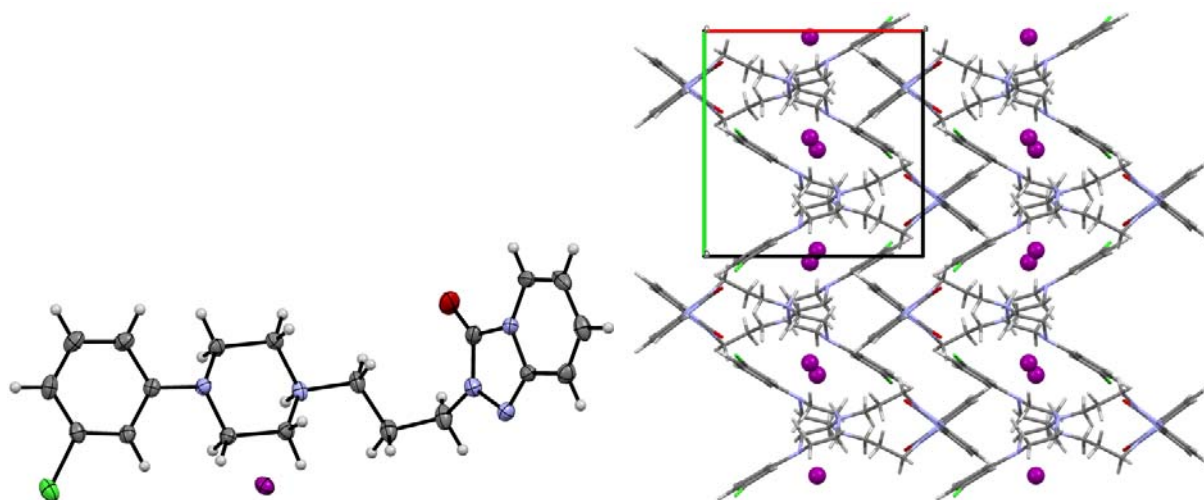

Supplementary Figure 24: Left: displacement ellipsoid representation of **[trazodonium][iodide]**, ellipsoids are drawn at 50% probability. Right: packing diagram of **[trazodonium][iodide]**.

### **[Trazodonium]<sub>2</sub>[oxalate]·10(H<sub>2</sub>O)**

This crystal was obtained at 4°C from a drop containing 69 mM Na<sub>2</sub>oxalate and 12 mM trazodone hydrochloride equilibrating against a reservoir of 138 mM Na<sub>2</sub>oxalate. This complex crystallized in the monoclinic space group *I2/a*. The asymmetric unit consists of one trazodonium cation, half an oxalate dianion and 6 sites for water molecules, of which 2 are half occupied. The trazodone cation is monoprotonated at the piperazine amine atom that is connected solely to aliphatic carbon atoms. This ammonium unit forms a double bifurcated hydrogen bond to the oxalate anion (N14-H14A O28: 2.7510(17) Å and N14-H14A O29(-x+1, -y+1, -z+1): 2.9474(17) Å respectively). The oxalate anion sits on an inversion center, it is sandwiched between two ammonium units of the trazodone.

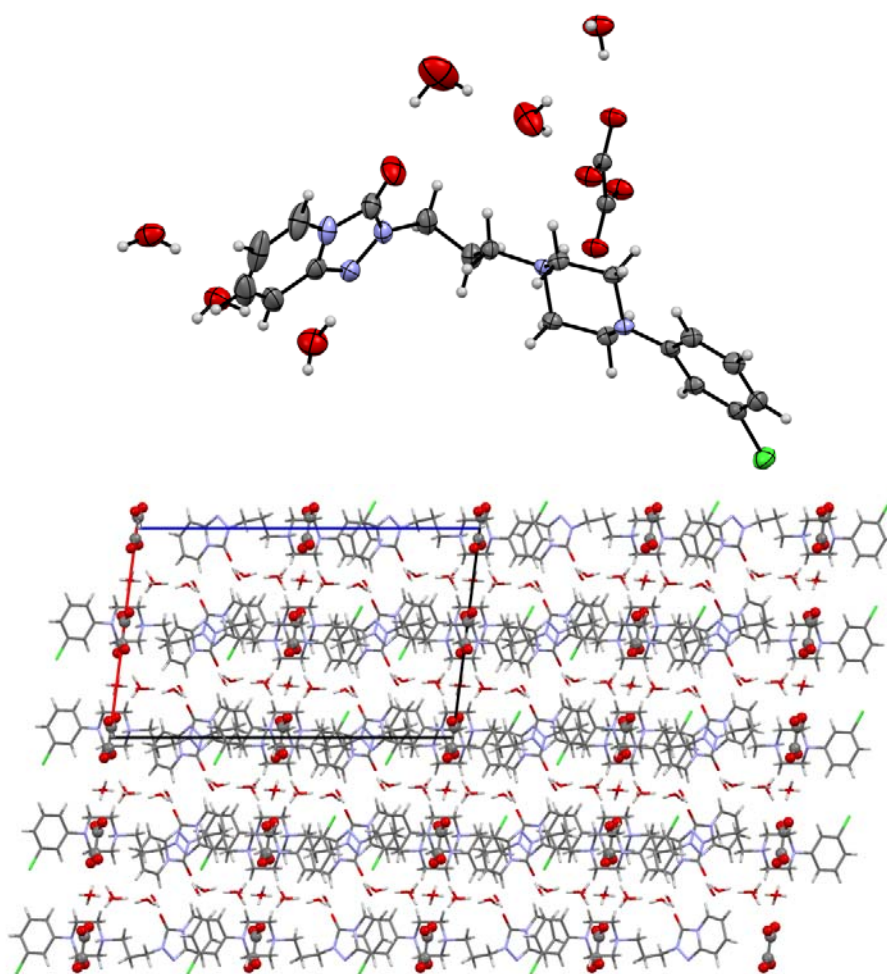

Supplementary Figure 25: Top: displacement ellipsoid representation of **[trazodonium]<sub>2</sub>[oxalate]·10(H<sub>2</sub>O)**, ellipsoids are drawn at 50% probability. One molecule of a protonated trazodone and a whole oxalate molecule is shown (see also paragraph above for a further discussion of the content of the asymmetric unit). Below: packing diagram of **[trazodonium]<sub>2</sub>[oxalate]·10(H<sub>2</sub>O)**.

### Trazodone·2(H<sub>2</sub>O)

This crystal was obtained from a solution containing 141 mM disodium-(DL)-tartrate and 23.5 mM trazodone that was equilibrated by vapour diffusion against a reservoir of 242 mM disodium-(DL)-tartrate. After covering the drop with oil (Infineum V8512, formerly known as Paratone N), crystals started to form at the interface between the oil and the aqueous phase and grew into the oil. The asymmetric unit contains one neutral trazodone molecule and two water molecules, one is disordered over 2 positions (ratio 1:1), the other is disordered over 3 positions (ratio 5:4:1). In addition, the triazolo-pyridinone ring is disordered in a 9:1 ratio.

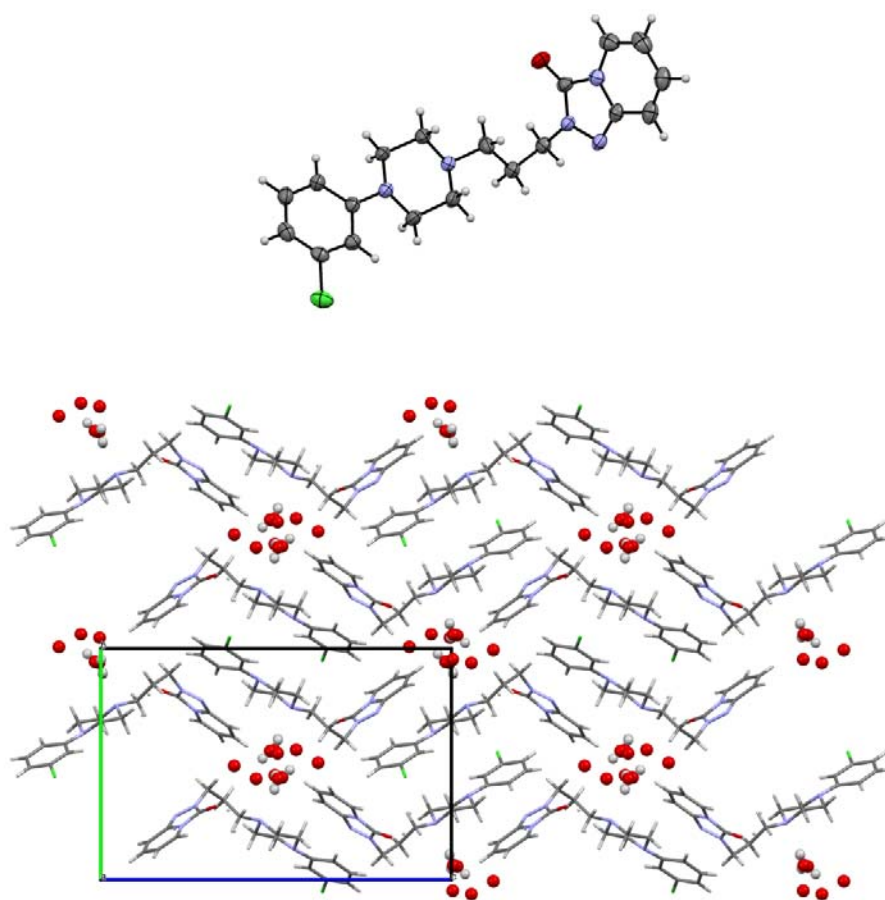

Supplementary Figure 26: Top: displacement ellipsoid representation of **trazodone·2(H<sub>2</sub>O)**, ellipsoids are drawn at 50% probability. For clarity, the disordered minor component of the trazodone molecules and the disordered water molecules are omitted. Below: packing diagram of **trazodone·2(H<sub>2</sub>O)**.

Supplementary Table 2. Composition and concentration of the counterion salts in the 96 wells of the organic cation crystallization screen.

| Well number | Chemical name                       | Conc. [M] |
|-------------|-------------------------------------|-----------|
| 1           | Sodium chloride                     | 3.00      |
| 2           | Sodium chloride                     | 1.50      |
| 3           | Sodium bromide                      | 4.00      |
| 4           | Sodium bromide                      | 2.00      |
| 5           | Sodium iodide                       | 5.30      |
| 6           | Sodium iodide                       | 2.50      |
| 7           | Sodium iodide                       | 1.25      |
| 8           | Potassium thiocyanate               | 7.30      |
| 9           | Potassium thiocyanate               | 3.50      |
| 10          | Potassium thiocyanate               | 1.75      |
| 11          | Sodium dicyanamide                  | 0.70      |
| 12          | Sodium tetrafluoroborate            | 4.00      |
| 13          | Sodium tetrafluoroborate            | 2.00      |
| 14          | Potassium hexafluorophosphate       | 0.24      |
| 15          | Sodium tetraphenylborate            | 0.40      |
| 16          | Sodium tetraphenylborate            | 0.20      |
| 17          | Disodium sulfate                    | 1.00      |
| 18          | Sodium methanesulfonate             | 3.60      |
| 19          | Sodium methanesulfonate             | 1.80      |
| 20          | Sodium triflate                     | 0.80      |
| 21          | Sodium isethionate                  | 2.20      |
| 22          | Sodium isethionate                  | 1.10      |
| 23          | Sodium (+/-)-camphorsulfonate       | 2.28      |
| 24          | Sodium benzenesulfonate             | 0.98      |
| 25          | Sodium 3-nitrobenzenesulfonate      | 0.42      |
| 26          | Sodium <i>p</i> -toluenesulfonate   | 0.15      |
| 27          | Sodium 1-naphthalensulfonate        | 0.35      |
| 28          | Sodium 2-naphthalensulfonate        | 0.13      |
| 29          | Disodium 2,6-naphthalenedisulfonate | 0.085     |
| 30          | Sodium nitrate                      | 4.60      |
| 31          | Sodium nitrate                      | 2.30      |

|    |                                    |       |
|----|------------------------------------|-------|
| 32 | Sodium benzoate                    | 1.80  |
| 33 | Sodium salicylate                  | 2.20  |
| 34 | Sodium salicylate                  | 1.10  |
| 35 | Sodium 4-aminosalicylate dihydrate | 1.50  |
| 36 | Sodium meta-hydroxybenzoate        | 1.30  |
| 37 | Sodium nicotinate                  | 2.96  |
| 38 | Sodium nicotinate                  | 1.48  |
| 39 | Potassium hydrogen phthalate       | 0.27  |
| 40 | Disodium isophthalate              | 1.40  |
| 41 | Disodium terephthalate             | 0.060 |
| 42 | Disodium pamoate                   | 0.050 |
| 43 | Sodium formate                     | 6.00  |
| 44 | Sodium formate                     | 3.00  |
| 45 | Sodium acetate                     | 2.60  |
| 46 | Sodium trifluoroacetate            | 2.40  |
| 47 | Sodium 2-phenylpropionate          | 1.70  |
| 48 | Sodium DL-mandelate                | 0.25  |
| 49 | Sodium D-mandelate                 | 0.25  |
| 50 | Sodium L-mandelate                 | 0.25  |
| 51 | Sodium 1-naphthalenacetate         | 0.43  |
| 52 | Sodium diphenylacetate             | 0.33  |
| 53 | Sodium <i>N</i> -acetylglycinate   | 2.28  |
| 54 | Sodium hippurate                   | 1.46  |
| 55 | Sodium pyrrolidone carboxylate     | 4.96  |
| 56 | Sodium propionate                  | 5.20  |
| 57 | Sodium propionate                  | 2.60  |
| 58 | Sodium DL-lactate                  | 3.42  |
| 59 | Sodium L-lactate                   | 3.42  |
| 60 | Sodium pyruvate                    | 3.00  |
| 61 | Sodium pyruvate                    | 1.50  |
| 62 | Sodium valerate                    | 3.19  |
| 63 | Sodium hexanoate                   | 2.70  |
| 64 | Sodium 2-ethylhexanoate            | 4.20  |
| 65 | Sodium 2-ethylhexanoate            | 2.10  |



|    |                                        |       |
|----|----------------------------------------|-------|
| 66 | Potassium gluconate                    | 1.10  |
| 67 | Sodium octanoate                       | 1.56  |
| 68 | Sodium hydrogen carbonate              | 0.60  |
| 69 | Disodium carbonate                     | 1.00  |
| 70 | Disodium oxalate                       | 0.14  |
| 71 | Disodium malonate                      | 2.97  |
| 72 | Disodium succinate                     | 1.13  |
| 73 | Disodium maleate                       | 0.66  |
| 74 | Disodium fumarate                      | 0.73  |
| 75 | Disodium DL-malate                     | 2.27  |
| 76 | Disodium L-malate                      | 2.92  |
| 77 | Sodium potassium L-tartrate            | 1.40  |
| 78 | Disodium DL -tartrate                  | 0.55  |
| 79 | Disodium L-tartrate                    | 1.00  |
| 80 | Disodium (+)-O,O'-dibenzoyl-D-tartrate | 0.26  |
| 81 | Potassium antimony tartrate            | 0.054 |
| 82 | Disodium N-acetylglutamate             | 1.63  |
| 83 | Disodium adipate                       | 1.19  |
| 84 | Potassium D-saccharate                 | 0.050 |
| 85 | Trisodium citrate dihydrate            | 0.90  |
| 86 | Sodium DL-aspartate                    | 0.25  |
| 87 | Sodium L-aspartate                     | 0.25  |
| 88 | Sodium L-glutamate                     | 2.00  |
| 89 | Sodium L-glutamate                     | 1.00  |
| 90 | Sodium diethyldithiocarbamate          | 0.011 |
| 91 | Sodium saccharine                      | 1.57  |
| 92 | Disodium hydrogen phosphate            | 0.43  |
| 93 | Sodium dihydrogen phosphate            | 4.00  |
| 94 | Sodium dihydrogen phosphate            | 2.00  |
| 95 | Disodium citrate                       | 0.93  |
| 96 | Trisodium phosphate (dodecahydrate)    | 0.36  |

Supplementary Table 3: Crystallographic data of the chloride, iodide, dihydrogenphosphate and antimony-L-tartrate salts of 5-benzyloxytryptaminium.

| name                                                           | [BaH][chloride]                                      | [BaH][iodide]                                       | [BaH][dihydrogen phosphate]                                                             | [BaH] <sub>2</sub> [antimony L-tartrate]·2(H <sub>2</sub> O)                                                                                                |
|----------------------------------------------------------------|------------------------------------------------------|-----------------------------------------------------|-----------------------------------------------------------------------------------------|-------------------------------------------------------------------------------------------------------------------------------------------------------------|
| Empirical formula                                              | [C <sub>17</sub> H <sub>19</sub> N <sub>2</sub> O]Cl | [C <sub>17</sub> H <sub>19</sub> N <sub>2</sub> O]I | [C <sub>17</sub> H <sub>19</sub> N <sub>2</sub> O]<br>[H <sub>2</sub> O <sub>4</sub> P] | [C <sub>17</sub> H <sub>19</sub> N <sub>2</sub> O] <sub>2</sub><br>[C <sub>8</sub> H <sub>4</sub> O <sub>12</sub> Sb <sub>2</sub> ]<br>·2(H <sub>2</sub> O) |
| Diffractometer                                                 | Synergy                                              | Synergy                                             | Synergy                                                                                 | Synergy                                                                                                                                                     |
| Wavelength (Å)                                                 | 1.54180                                              | 1.54180                                             | 1.54180                                                                                 | 1.54180                                                                                                                                                     |
| mol. weight (g/mol)                                            | 302.80                                               | 394.26                                              | 364.34                                                                                  | 1106.34                                                                                                                                                     |
| Crystal system                                                 | monoclinic                                           | monoclinic                                          | monoclinic                                                                              | monoclinic                                                                                                                                                  |
| Space group                                                    | <i>P</i> 2 <sub>1</sub> / <i>c</i>                   | <i>P</i> 2 <sub>1</sub> / <i>c</i>                  | <i>P</i> 2 <sub>1</sub> / <i>c</i>                                                      | <i>C</i> 2                                                                                                                                                  |
| a (Å)                                                          | 18.7661(5)                                           | 19.6674(3)                                          | 20.7561(2)                                                                              | 22.3684(7)                                                                                                                                                  |
| b (Å)                                                          | 8.8339(2)                                            | 8.1224(1)                                           | 9.5134(1)                                                                               | 8.4156(1)                                                                                                                                                   |
| c (Å)                                                          | 9.6084(3)                                            | 10.8447(2)                                          | 8.5352(1)                                                                               | 15.6852(4)                                                                                                                                                  |
| α (°)                                                          | 90                                                   | 90                                                  | 90                                                                                      | 90                                                                                                                                                          |
| β (°)                                                          | 100.318(3)                                           | 105.2892(16)                                        | 96.5078(9)                                                                              | 130.585(5)                                                                                                                                                  |
| γ (°)                                                          | 90                                                   | 90                                                  | 90                                                                                      | 90                                                                                                                                                          |
| Volume (Å <sup>3</sup> )                                       | 1567.10(7)                                           | 1671.09(5)                                          | 1674.51(3)                                                                              | 2242.36(19)                                                                                                                                                 |
| Z                                                              | 4                                                    | 4                                                   | 4                                                                                       | 2                                                                                                                                                           |
| Density(calc.) (g/cm <sup>3</sup> )                            | 1.283                                                | 1.567                                               | 1.445                                                                                   | 1.639                                                                                                                                                       |
| Linear abs. coeff. (mm <sup>-1</sup> )                         | 2.152                                                | 15.054                                              | 1.741                                                                                   | 10.200                                                                                                                                                      |
| F(000)                                                         | 640.0                                                | 784.0                                               | 768.0                                                                                   | 1112.0                                                                                                                                                      |
| Crystal size (mm <sup>3</sup> )                                | 0.26 × 0.15 × 0.02                                   | 0.56 × 0.44 × 0.02                                  | 0.23 × 0.15 × 0.01                                                                      | 0.39 × 0.03 × 0.01                                                                                                                                          |
| Crystal description                                            | plate, colorless                                     | plate, colorless                                    | plate, colorless                                                                        | lath, colorless                                                                                                                                             |
| θ range (°)                                                    | 4.790; 74.494                                        | 4.662; 74.462                                       | 4.288; 75.865                                                                           | 3.711; 78.973                                                                                                                                               |
| Reflections collected                                          | 30743                                                | 33730                                               | 34497                                                                                   | 22761                                                                                                                                                       |
| Indep. reflections                                             | 3187<br>[R <sub>int</sub> = 0.0435]                  | 3418<br>[R <sub>int</sub> = 0.0527]                 | 3487<br>[R <sub>int</sub> = 0.0301]                                                     | 4676<br>[R <sub>int</sub> = 0.0948]                                                                                                                         |
| Reflections obs.                                               | 2941                                                 | 3145                                                | 3276                                                                                    | 4563                                                                                                                                                        |
| Criterion for obs.                                             | I > 2.0σ(I)                                          | I > 2.0σ(I)                                         | I > 2.0σ(I)                                                                             | I > 2.0σ(I)                                                                                                                                                 |
| Completeness to θ (°)                                          | 0.999 to 74.494                                      | 1 to 74.462                                         | 0.999 to 75.865                                                                         | 0.998 to 77.394                                                                                                                                             |
| Absorption corr.                                               | multi-scan                                           | multi-scan                                          | multi-scan                                                                              | multi-scan                                                                                                                                                  |
| Min. and max. transm.                                          | 0.74 and 0.96                                        | 0.02 and 0.73                                       | 0.44 and 0.98                                                                           | 0.25 and 0.89                                                                                                                                               |
| Reflections / restraints / parameters                          | 3187 / 0 / 190                                       | 3418 / 0 / 190                                      | 3487 / 0 / 226                                                                          | 4676 / 5 / 290                                                                                                                                              |
| Goodness-of-fit on F <sup>2</sup>                              | 0.9683                                               | 0.9797                                              | 0.9648                                                                                  | 0.9417                                                                                                                                                      |
| Final R indices [I > 2.0σ(I)]                                  | R <sub>1</sub> = 0.0381<br>wR <sub>2</sub> = 0.0949  | R <sub>1</sub> = 0.0226<br>wR <sub>2</sub> = 0.0605 | R <sub>1</sub> = 0.0294<br>wR <sub>2</sub> = 0.0750                                     | R <sub>1</sub> = 0.0453<br>wR <sub>2</sub> = 0.1189                                                                                                         |
| R indices (all data)                                           | R <sub>1</sub> = 0.0406<br>wR <sub>2</sub> = 0.0965  | R <sub>1</sub> = 0.0246<br>wR <sub>2</sub> = 0.0622 | R <sub>1</sub> = 0.0312<br>wR <sub>2</sub> = 0.0761                                     | R <sub>1</sub> = 0.0458<br>wR <sub>2</sub> = 0.1194                                                                                                         |
| Final Δρ <sub>max,min</sub> (e <sup>-</sup> / Å <sup>3</sup> ) | 0.42 and -0.37                                       | 1.01 and -0.50                                      | 0.25 and -0.38                                                                          | 2.37 and -0.68                                                                                                                                              |
| Flack parameter                                                | not applicable                                       | not applicable                                      | not applicable                                                                          | -0.010(9)                                                                                                                                                   |
| CSD number                                                     | 1585748                                              | 1585750                                             | 1585749                                                                                 | 1585752                                                                                                                                                     |

Supplementary Table 4: Crystallographic data of the L-tartrate, oxalate, sulfate, tetrafluoroborate and thiocyanate salts of 5-benzylxytryptaminium.

| name                                   | <b>[BaH]<sub>2</sub></b><br><b>[L-tartrate]</b><br>·3.35(H <sub>2</sub> O)                                                                    | <b>[BaH]<sub>2</sub>[oxalate]</b><br>·2(H <sub>2</sub> O)                                                               | <b>[BaH]<sub>2</sub>[sulfate]</b><br>·2 (H <sub>2</sub> O)                                   | <b>[BaH]</b><br><b>[tetrafluoro-</b><br><b>borate]</b>                   | <b>[BaH]</b><br><b>[thiocyanate]</b>                        |
|----------------------------------------|-----------------------------------------------------------------------------------------------------------------------------------------------|-------------------------------------------------------------------------------------------------------------------------|----------------------------------------------------------------------------------------------|--------------------------------------------------------------------------|-------------------------------------------------------------|
| Empirical formula                      | [C <sub>17</sub> H <sub>19</sub> N <sub>2</sub> O] <sub>2</sub><br>[C <sub>4</sub> H <sub>4</sub> O <sub>6</sub> ]<br>·3.35(H <sub>2</sub> O) | [C <sub>17</sub> H <sub>19</sub> N <sub>2</sub> O] <sub>2</sub><br>[C <sub>2</sub> O <sub>4</sub> ]·2(H <sub>2</sub> O) | [C <sub>17</sub> H <sub>19</sub> N <sub>2</sub> O]<br>[O <sub>4</sub> S]·2(H <sub>2</sub> O) | [C <sub>17</sub> H <sub>19</sub> N <sub>2</sub> O]<br>[BF <sub>4</sub> ] | [C <sub>17</sub> H <sub>19</sub> N <sub>2</sub> O]<br>[NCS] |
| Diffractometer                         | Synergy                                                                                                                                       | Synergy                                                                                                                 | Synergy                                                                                      | Synergy                                                                  | Synergy                                                     |
| Wavelength (Å)                         | 1.54180                                                                                                                                       | 1.54180                                                                                                                 | 1.54180                                                                                      | 1.54180                                                                  | 1.54180                                                     |
| mol. weight (g/mol)                    | 742.37                                                                                                                                        | 654.72                                                                                                                  | 666.80                                                                                       | 354.15                                                                   | 325.43                                                      |
| Crystal system                         | monoclinic                                                                                                                                    | monoclinic                                                                                                              | monoclinic                                                                                   | monoclinic                                                               | monoclinic                                                  |
| Space group                            | <i>P</i> 2 <sub>1</sub>                                                                                                                       | <i>P</i> 2 <sub>1</sub>                                                                                                 | <i>P</i> 2 <sub>1</sub>                                                                      | <i>P</i> 2 <sub>1</sub> /c                                               | <i>P</i> 2 <sub>1</sub> /c                                  |
| a (Å)                                  | 8.8100(1)                                                                                                                                     | 9.0081 (1)                                                                                                              | 8.6454 (1)                                                                                   | 19.5805 (2)                                                              | 19.8981 (7)                                                 |
| b (Å)                                  | 9.7133(2)                                                                                                                                     | 9.3218 (1)                                                                                                              | 9.4630 (1)                                                                                   | 9.7595 (1)                                                               | 8.0213 (2)                                                  |
| c (Å)                                  | 21.7147(4)                                                                                                                                    | 19.4957 (2)                                                                                                             | 20.0392 (2)                                                                                  | 8.9644 (1)                                                               | 10.8806 (3)                                                 |
| α (°)                                  | 90                                                                                                                                            | 90                                                                                                                      | 90                                                                                           | 90                                                                       | 90                                                          |
| β (°)                                  | 100.1689(16)                                                                                                                                  | 95.3510 (9)                                                                                                             | 96.7530 (9)                                                                                  | 103.1581 (12)                                                            | 100.435 (3)                                                 |
| γ (°)                                  | 90                                                                                                                                            | 90                                                                                                                      | 90                                                                                           | 90                                                                       | 90                                                          |
| Volume (Å <sup>3</sup> )               | 1829.03(6)                                                                                                                                    | 1629.95 (3)                                                                                                             | 1628.06 (3)                                                                                  | 1668.08 (3)                                                              | 1707.92 (9)                                                 |
| Z                                      | 2                                                                                                                                             | 2                                                                                                                       | 2                                                                                            | 4                                                                        | 4                                                           |
| Density(calc.) (g/cm <sup>3</sup> )    | 1.349                                                                                                                                         | 1.334                                                                                                                   | 1.360                                                                                        | 1.410                                                                    | 1.266                                                       |
| Linear abs. coeff. (mm <sup>-1</sup> ) | 0.83                                                                                                                                          | 0.783                                                                                                                   | 1.373                                                                                        | 1.013                                                                    | 1.739                                                       |
| F(000)                                 | 789.6                                                                                                                                         | 692.0                                                                                                                   | 708.0                                                                                        | 736.0                                                                    | 688.0                                                       |
| Crystal size (mm <sup>3</sup> )        | 0.08 × 0.06 ×<br>0.007                                                                                                                        | 0.11 × 0.10 ×<br>0.02                                                                                                   | 0.08 × 0.05 ×<br>0.03                                                                        | 0.26 × 0.24 ×<br>0.01                                                    | 0.12 × 0.07 ×<br>0.02                                       |
| Crystal description                    | plate, colorless                                                                                                                              | plate, colorless                                                                                                        | plate, colorless                                                                             | plate, colorless                                                         | plate, colorless                                            |
| θ range (°)                            | 4.137; 74.489                                                                                                                                 | 4.556; 74.493                                                                                                           | 4.444; 74.500                                                                                | 4.638; 74.504                                                            | 4.519; 74.390                                               |
| Reflections collected                  | 31303                                                                                                                                         | 34550                                                                                                                   | 34569                                                                                        | 18232                                                                    | 10335                                                       |
| Indep. reflections                     | 7406<br>[R <sub>int</sub> = 0.0442]                                                                                                           | 6622<br>[R <sub>int</sub> = 0.0325]                                                                                     | 6613<br>[R <sub>int</sub> = 0.0414]                                                          | 3411<br>[R <sub>int</sub> = 0.0336]                                      | 3450<br>[R <sub>int</sub> = 0.0220]                         |
| Reflections obs.                       | 6788                                                                                                                                          | 6365                                                                                                                    | 6209                                                                                         | 3088                                                                     | 2987                                                        |
| Criterion for obs.                     | I > 2.0σ(I)                                                                                                                                   | I > 2.0σ(I)                                                                                                             | I > 2.0σ(I)                                                                                  | I > 2.0σ(I)                                                              | I > 2.0σ(I)                                                 |
| Completeness to θ (°)                  | 0.999 to 67.680                                                                                                                               | 0.997 to 74.493                                                                                                         | 0.999 to 74.500                                                                              | 1.000 to 74.504                                                          | 0.995 to 74.390                                             |
| Absorption corr.                       | gaussian                                                                                                                                      | multi-scan                                                                                                              | multi-scan                                                                                   | multi-scan                                                               | multi-scan                                                  |
| Min. and max. transm.                  | 0.803 and 1                                                                                                                                   | 0.67 and 0.98                                                                                                           | 0.81 and 0.97                                                                                | 0.21 and 0.99                                                            | 0.83 and 0.97                                               |
| Reflections / restraints /             | 7406 / 21 / 526                                                                                                                               | 6622 / 67 / 516                                                                                                         | 6613 / 5 / 425                                                                               | 3411 / 0 / 226                                                           | 3450 / 0 / 208                                              |

|                                                       |                                   |                                   |                                   |                                   |                                   |
|-------------------------------------------------------|-----------------------------------|-----------------------------------|-----------------------------------|-----------------------------------|-----------------------------------|
| parameters                                            |                                   |                                   |                                   |                                   |                                   |
| Goodness-of-fit on $F^2$                              | 1.049                             | 0.9838                            | 0.9540                            | 0.9896                            | 0.9770                            |
| Final R ind. [ $I > 2.0\sigma(I)$ ]                   | $R_1 = 0.0411$<br>$wR_2 = 0.1118$ | $R_1 = 0.0344$<br>$wR_2 = 0.0973$ | $R_1 = 0.0417$<br>$wR_2 = 0.1038$ | $R_1 = 0.0361$<br>$wR_2 = 0.0942$ | $R_1 = 0.0338$<br>$wR_2 = 0.0819$ |
| R indices (all data)                                  | $R_1 = 0.0451$<br>$wR_2 = 0.1144$ | $R_1 = 0.0356$<br>$wR_2 = 0.0984$ | $R_1 = 0.0441$<br>$wR_2 = 0.1063$ | $R_1 = 0.0399$<br>$wR_2 = 0.0971$ | $R_1 = 0.0401$<br>$wR_2 = 0.0873$ |
| Final $\Delta\rho_{\max,\min}$ ( $e^-/\text{\AA}^3$ ) | 0.51 and -0.37                    | 0.31 and -0.24                    | 0.80 and -0.39                    | 0.28 and -0.21                    | 0.38 and -0.26                    |
| Flack parameter                                       | -0.11(8)                          | 0.17(14)                          | 0.114(15)                         | not applicable                    | not applicable                    |
| CSD number                                            | 1585755                           | 1585751                           | 1585754                           | 1585747                           | 1585753                           |

Supplementary Table 5: Summary of crystals containing carnitinenitrile

| name                                                          | <b>[(+/-)-Car][tetraphenylborate]</b>                                                | <b>[(-)-Car][tetraphenylborate]</b>                                                  |
|---------------------------------------------------------------|--------------------------------------------------------------------------------------|--------------------------------------------------------------------------------------|
| Empirical formula                                             | [C <sub>7</sub> H <sub>15</sub> N <sub>2</sub> O][C <sub>24</sub> H <sub>20</sub> B] | [C <sub>7</sub> H <sub>15</sub> N <sub>2</sub> O][C <sub>24</sub> H <sub>20</sub> B] |
| Diffractionmeter                                              | Xcalibur                                                                             | SuperNova                                                                            |
| Wavelength (Å)                                                | 0.71073                                                                              | 1.5418                                                                               |
| mol. weight (g/mol)                                           | 462.44                                                                               | 462.44                                                                               |
| Crystal system                                                | monoclinic                                                                           | orthorhombic                                                                         |
| Space group                                                   | <i>P</i> 2 <sub>1</sub> / <i>n</i>                                                   | <i>P</i> 2 <sub>1</sub> 2 <sub>1</sub> 2 <sub>1</sub>                                |
| a (Å)                                                         | 10.1433 (4)                                                                          | 9.49835 (14)                                                                         |
| b (Å)                                                         | 18.6189 (6)                                                                          | 11.89113 (17)                                                                        |
| c (Å)                                                         | 14.0467 (5)                                                                          | 22.8675 (3)                                                                          |
| α (°)                                                         | 90                                                                                   | 90                                                                                   |
| β (°)                                                         | 99.569 (3)                                                                           | 90                                                                                   |
| γ (°)                                                         | 90                                                                                   | 90                                                                                   |
| Volume (Å <sup>3</sup> )                                      | 2615.91 (16)                                                                         | 2582.79 (6)                                                                          |
| Z                                                             | 4                                                                                    | 4                                                                                    |
| Density(calc.) (g/cm <sup>3</sup> )                           | 1.174                                                                                | 1.189                                                                                |
| Linear abs. coeff. (mm <sup>-1</sup> )                        | 0.070                                                                                | 0.542                                                                                |
| F(000)                                                        | 992.0                                                                                | 992.0                                                                                |
| Crystal size (mm <sup>3</sup> )                               | 0.48 × 0.46 × 0.05                                                                   | 0.43 × 0.10 × 0.09                                                                   |
| Crystal description                                           | plate, colorless                                                                     | prism, colorless                                                                     |
| θ range (°)                                                   | 2.311; 30.505                                                                        | 3.866; 74.454                                                                        |
| Reflections collected                                         | 33386                                                                                | 21298                                                                                |
| Indep. reflections                                            | 7988 [R <sub>int</sub> = 0.0359]                                                     | 5254 [R <sub>int</sub> = 0.0260]                                                     |
| Reflections obs.                                              | 6470                                                                                 | 5101                                                                                 |
| Criterion for obs.                                            | I > 2.0σ(I)                                                                          | I > 2.0σ(I)                                                                          |
| Completeness to θ (°)                                         | 1.000 to 30.505                                                                      | 1.000 to 74.454                                                                      |
| Absorption corr                                               | multi-scan                                                                           | multi-scan                                                                           |
| Min. and max. transm.                                         | 0.99 and 1.00                                                                        | 0.69 and 0.95                                                                        |
| Reflections / restraints / parameters                         | 7983 / 128 / 407                                                                     | 5254 / 0 / 316                                                                       |
| Goodness-of-fit on F <sup>2</sup>                             | 1.0133                                                                               | 0.9920                                                                               |
| Final R ind. [I > 2.0σ(I)]                                    | R <sub>1</sub> = 0.0578, wR <sub>2</sub> = 0.1365                                    | R <sub>1</sub> = 0.0272, wR <sub>2</sub> = 0.0703                                    |
| R indices (all data)                                          | R <sub>1</sub> = 0.0721, wR <sub>2</sub> = 0.1480                                    | R <sub>1</sub> = 0.0281, wR <sub>2</sub> = 0.0713                                    |
| Final Δρ <sub>max,min</sub> (e <sup>-</sup> /Å <sup>3</sup> ) | 0.47 and -0.46                                                                       | 0.21 and -0.11                                                                       |
| Flack parameter                                               | not applicable                                                                       | 0.0(3)                                                                               |
| CSD number                                                    | 1585762                                                                              | 1585761                                                                              |

Supplementary Table 6: Crystallographic summary of the crystals containing 2-(3-(3,5-bis(trifluoromethyl)phenyl)-thioureido)-N,N,N-trimethylethanammonium (**Cat**)

| name                                                             | <b>[Cat][bromide]</b>                                               | <b>[Cat][potassium]<br/>[hexafluorophosphate]<sub>2</sub></b>                                     |
|------------------------------------------------------------------|---------------------------------------------------------------------|---------------------------------------------------------------------------------------------------|
| Empirical formula                                                | [C <sub>14</sub> H <sub>18</sub> F <sub>6</sub> N <sub>3</sub> S]Br | [C <sub>14</sub> H <sub>18</sub> F <sub>6</sub> N <sub>3</sub> S]K[F <sub>6</sub> P] <sub>2</sub> |
| Diffractometer                                                   | Synergy                                                             | Synergy                                                                                           |
| Wavelength (Å)                                                   | 1.54180                                                             | 1.54180                                                                                           |
| mol. weight (g/mol)                                              | 454.27                                                              | 703.39                                                                                            |
| Crystal system                                                   | monoclinic                                                          | monoclinic                                                                                        |
| Space group                                                      | <i>P</i> 2 <sub>1</sub> / <i>c</i>                                  | <i>P</i> 2 <sub>1</sub> / <i>c</i>                                                                |
| <i>a</i> (Å)                                                     | 10.9874 (1)                                                         | 24.3732 (2)                                                                                       |
| <i>b</i> (Å)                                                     | 14.2737 (1)                                                         | 10.4084 (1)                                                                                       |
| <i>c</i> (Å)                                                     | 23.2106 (1)                                                         | 9.9932 (1)                                                                                        |
| $\alpha$ (°)                                                     | 90                                                                  | 90                                                                                                |
| $\beta$ (°)                                                      | 90.2783 (5)                                                         | 93.1701 (9)                                                                                       |
| $\gamma$ (°)                                                     | 90                                                                  | 90                                                                                                |
| Volume (Å <sup>3</sup> )                                         | 3640.10 (4)                                                         | 2531.26 (4)                                                                                       |
| <i>Z</i>                                                         | 8                                                                   | 4                                                                                                 |
| Density(calc.) (g/cm <sup>3</sup> )                              | 1.658                                                               | 1.846                                                                                             |
| Linear abs. coeff. (mm <sup>-1</sup> )                           | 4.736                                                               | 5.196                                                                                             |
| F(000)                                                           | 1824.0                                                              | 1400.0                                                                                            |
| Crystal size (mm <sup>3</sup> )                                  | 0.48 × 0.13 × 0.06                                                  | 0.11 × 0.05 × 0.02                                                                                |
| Crystal description                                              | lath, colorless                                                     | lath, colorless                                                                                   |
| $\theta$ range (°)                                               | 3.635; 72.121                                                       | 3.632; 74.496                                                                                     |
| Reflections collected                                            | 46471                                                               | 49106                                                                                             |
| Indep. reflections                                               | 7149 [R <sub>int</sub> = 0.0269]                                    | 5098 [R <sub>int</sub> = 0.0450]                                                                  |
| Reflections obs.                                                 | 6871                                                                | 4507                                                                                              |
| Criterion for obs.                                               | I > 2.0 $\sigma$ (I)                                                | I > 2.0 $\sigma$ (I)                                                                              |
| Completeness to $\theta$ (°)                                     | 0.995 to 72.121                                                     | 0.987 to 74.33                                                                                    |
| Absorption corr.                                                 | multi-scan                                                          | multi-scan                                                                                        |
| Min. and max. transm.                                            | 0.11 and 0.76                                                       | 0.64 and 0.92                                                                                     |
| Reflections / restraints / parameters                            | 7149 / 22 / 535                                                     | 5098 / 79 / 408                                                                                   |
| Goodness-of-fit on F <sup>2</sup>                                | 1.0022                                                              | 1.0134                                                                                            |
| Final R ind. [I > 2.0 $\sigma$ (I)]                              | R <sub>1</sub> = 0.0221, wR <sub>2</sub> = 0.0551                   | R <sub>1</sub> = 0.0441, wR <sub>2</sub> = 0.1053                                                 |
| R indices (all data)                                             | R <sub>1</sub> = 0.0230, wR <sub>2</sub> = 0.0556                   | R <sub>1</sub> = 0.0496, wR <sub>2</sub> = 0.1087                                                 |
| Final $\Delta\rho_{\max,\min}$ (e <sup>-</sup> /Å <sup>3</sup> ) | 0.50 and -0.41                                                      | 0.84 and -0.48                                                                                    |
| CSD number                                                       | 1585756                                                             | 1585757                                                                                           |

Supplementary Table 7: Crystallographic data of crystals containing ephedrinium chloride, bromide and iodide (form II) salts.

| name                                                          | <b>[(+)-EphH][chloride]</b>                         | <b>[(+)-EphH][bromide]</b>                          | <b>[(+)-EphH][iodide],<br/>form II</b>              |
|---------------------------------------------------------------|-----------------------------------------------------|-----------------------------------------------------|-----------------------------------------------------|
| Empirical formula                                             | [C <sub>10</sub> H <sub>16</sub> CNO]Cl             | [C <sub>10</sub> H <sub>16</sub> NO]Br              | [C <sub>10</sub> H <sub>16</sub> NO]I               |
| Diffractometer                                                | Synergy                                             | Supernova                                           | Synergy                                             |
| Wavelength (Å)                                                | 0.71073                                             | 0.71073                                             | 1.54184                                             |
| mol. weight (g/mol)                                           | 201.69                                              | 246.15                                              | 293.14                                              |
| Crystal system                                                | monoclinic                                          | monoclinic                                          | monoclinic                                          |
| Space group                                                   | <i>P</i> 2 <sub>1</sub>                             | <i>P</i> 2 <sub>1</sub>                             | <i>P</i> 2 <sub>1</sub>                             |
| a (Å)                                                         | 7.2565(3)                                           | 7.4467(2)                                           | 5.40542(18)                                         |
| b (Å)                                                         | 6.1232(3)                                           | 6.20961(16)                                         | 6.94898(18)                                         |
| c (Å)                                                         | 12.5570(6)                                          | 12.5863(4)                                          | 16.0701(4)                                          |
| α (°)                                                         | 90                                                  | 90                                                  | 90                                                  |
| β (°)                                                         | 102.256(5)                                          | 101.176(3)                                          | 95.864(3)                                           |
| γ (°)                                                         | 90                                                  | 90                                                  | 90                                                  |
| Volume (Å <sup>3</sup> )                                      | 545.23(4)                                           | 570.96(3)                                           | 600.47(3)                                           |
| Z                                                             | 2                                                   | 2                                                   | 2                                                   |
| Density(calc.) (g/cm <sup>3</sup> )                           | 1.229                                               | 1.432                                               | 1.621                                               |
| Linear abs. coeff. (mm <sup>-1</sup> )                        | 0.314                                               | 3.565                                               | 20.679                                              |
| F(000)                                                        | 216                                                 | 252                                                 | 288                                                 |
| Crystal size (mm <sup>3</sup> )                               | 0.40 × 0.08 × 0.04                                  | 0.41 × 0.07 × 0.05                                  | 0.25 × 0.06 × 0.011                                 |
| Crystal description                                           | colourless needle                                   | needle, colorless                                   | plate, colorless                                    |
| θ range (°)                                                   | 2.873; 32.767                                       | 2.952; 32.888                                       | 5.535; 74.157                                       |
| Reflections collected                                         | 7304                                                | 9436                                                | 7652                                                |
| Indep. reflections                                            | 3239<br>[R <sub>int</sub> = 0.0287]                 | 3804<br>[R <sub>int</sub> = 0.0227]                 | 2282<br>[R <sub>int</sub> = 0.0330]                 |
| Reflections obs.                                              | 2969                                                | 3388                                                | 2164                                                |
| Criterion for obs.                                            | I > 2.0σ(I)                                         | I > 2.0σ(I)                                         | I > 2.0σ(I)                                         |
| Completeness to θ (°)                                         | 99.8 % to 25.242°                                   | 99.8 % to 25.242°                                   | 0.978 to 67.684                                     |
| Absorption corr.                                              | multi-scan                                          | gaussian                                            | gaussian                                            |
| Min. and max. transm.                                         | 0.74501 and 1                                       | 0.543 and 1                                         | 0.215 and 0.993                                     |
| Reflections / restraints / parameters                         | 3239 / 1 / 121                                      | 3804 / 1 / 121                                      | 2282 / 1 / 121                                      |
| Goodness-of-fit on F <sup>2</sup>                             | 1.059                                               | 1.045                                               | 1.075                                               |
| Final R ind. [I > 2.0σ(I)]                                    | R <sub>1</sub> = 0.0302<br>wR <sub>2</sub> = 0.0722 | R <sub>1</sub> = 0.0303<br>wR <sub>2</sub> = 0.0716 | R <sub>1</sub> = 0.0254<br>wR <sub>2</sub> = 0.0629 |
| R indices (all data)                                          | R <sub>1</sub> = 0.0338<br>wR <sub>2</sub> = 0.0737 | R <sub>1</sub> = 0.0380<br>wR <sub>2</sub> = 0.0749 | R <sub>1</sub> = 0.0278<br>wR <sub>2</sub> = 0.0642 |
| Final Δρ <sub>max,min</sub> (e <sup>-</sup> /Å <sup>3</sup> ) | 0.283 and -0.166                                    | 0.387 and -0.280                                    | 0.30/-0.69                                          |
| Flack parameter                                               | -0.02(3)                                            | -0.009(5)                                           | -0.018(10)                                          |
| CSD number                                                    | 1823199                                             | 1823200                                             | 1585759                                             |

Supplementary Table 8: Crystallographic data of crystals containing ephedrinium iodide (form I), oxalate and thiocyanate salts.

| name                                                          | <b>[(+)-EphH][iodide],<br/>form I</b>                 | <b>[(+)-EphH]<sub>2</sub>[oxalate]</b>                                             | <b>[(+)-EphH]<br/>thiocyanate</b>                     |
|---------------------------------------------------------------|-------------------------------------------------------|------------------------------------------------------------------------------------|-------------------------------------------------------|
| Empirical formula                                             | [C <sub>10</sub> H <sub>16</sub> NO]I                 | [C <sub>10</sub> H <sub>16</sub> NO] <sub>2</sub> [C <sub>2</sub> O <sub>4</sub> ] | [C <sub>10</sub> H <sub>16</sub> NO]SCN               |
| Diffractionmeter                                              | Synergy                                               | SuperNova                                                                          | Synergy                                               |
| Wavelength (Å)                                                | 0.71073                                               | 0.71073                                                                            | 1.54184                                               |
| mol. weight (g/mol)                                           | 293.14                                                | 420.49                                                                             | 224.32                                                |
| Crystal system                                                | orthorhombic                                          | monoclinic                                                                         | orthorhombic                                          |
| Space group                                                   | <i>P</i> 2 <sub>1</sub> 2 <sub>1</sub> 2 <sub>1</sub> | <i>C</i> 2                                                                         | <i>P</i> 2 <sub>1</sub> 2 <sub>1</sub> 2 <sub>1</sub> |
| a (Å)                                                         | 7.32726(12)                                           | 13.5545(2)                                                                         | 6.09862(6)                                            |
| b (Å)                                                         | 18.9411(3)                                            | 5.84781(7)                                                                         | 7.52704(9)                                            |
| c (Å)                                                         | 25.6662(5)                                            | 14.1657(2)                                                                         | 27.3811(3)                                            |
| α (°)                                                         | 90                                                    | 90                                                                                 | 90                                                    |
| β (°)                                                         | 90                                                    | 110.071(2)                                                                         | 90                                                    |
| γ (°)                                                         | 90                                                    | 90                                                                                 | 90                                                    |
| Volume (Å <sup>3</sup> )                                      | 3562.12(11)                                           | 1054.64(3)                                                                         | 1256.92(2)                                            |
| Z                                                             | 12                                                    | 2                                                                                  | 4                                                     |
| Density(calc.) (g/cm <sup>3</sup> )                           | 1.64                                                  | 1.324                                                                              | 1.185                                                 |
| Linear abs. coeff. (mm <sup>-1</sup> )                        | 2.664                                                 | 0.096                                                                              | 2.107                                                 |
| F(000)                                                        | 1728                                                  | 452                                                                                | 480                                                   |
| Crystal size (mm <sup>3</sup> )                               | 0.29 × 0.17 × 0.05                                    | 0.39 × 0.18 × 0.11                                                                 | 0.16 × 0.14 × 0.010                                   |
| Crystal description                                           | plate, colorless                                      | prism, colorless                                                                   | colourless plate                                      |
| θ range (°)                                                   | 2.150; 33.484                                         | 3.591; 35.243                                                                      | 3.228; 78.698                                         |
| Reflections collected                                         | 88148                                                 | 20898                                                                              | 10879                                                 |
| Indep. reflections                                            | 12569<br>[R <sub>int</sub> = 0.0322]                  | 4451<br>[R <sub>int</sub> = 0.0255]                                                | 2659<br>[R <sub>int</sub> = 0.0261]                   |
| Reflections obs.                                              | 11728                                                 | 4049                                                                               | 2582                                                  |
| Criterion for obs.                                            | I > 2.0σ(I)                                           | I > 2.0σ(I)                                                                        | I > 2.0σ(I)                                           |
| Completeness to θ (°)                                         | 0.999 to 25.242                                       | 0.996 to 25.242                                                                    | 99.6 % to 67.684°                                     |
| Absorption corr.                                              | gaussian                                              | gaussian                                                                           | multi-scan                                            |
| Min. and max. transm.                                         | 0.419 and 1                                           | 0.568 and 1                                                                        | 0.82868 and 1                                         |
| Reflections / restraints / parameters                         | 12569 / 0 / 361                                       | 4451 / 1 / 145                                                                     | 2659 / 0 / 139                                        |
| Goodness-of-fit on F <sup>2</sup>                             | 1.067                                                 | 1.05                                                                               | 1.048                                                 |
| Final R ind. [I > 2.0σ(I)]                                    | R <sub>1</sub> = 0.0225<br>wR <sub>2</sub> = 0.0472   | R <sub>1</sub> = 0.0337<br>wR <sub>2</sub> = 0.0811                                | R <sub>1</sub> = 0.0258<br>wR <sub>2</sub> = 0.0672   |
| R indices (all data)                                          | R <sub>1</sub> = 0.0258<br>wR <sub>2</sub> = 0.0480   | R <sub>1</sub> = 0.0418,<br>wR <sub>2</sub> = 0.0864                               | R <sub>1</sub> = 0.0267<br>wR <sub>2</sub> = 0.0676   |
| Final Δρ <sub>max,min</sub> (e <sup>-</sup> /Å <sup>3</sup> ) | 0.92 and -0.898                                       | 0.33 and -0.18                                                                     | 0.174 and -0.164                                      |
| Flack parameter                                               | -0.020(5)                                             | 0.2(2)                                                                             | -0.005(6)                                             |
| CSD number                                                    | 1585758                                               | 1585760                                                                            | 1823201                                               |



Supplementary Table 9: Crystallographic data of crystals containing trazodone

| name                                                          | [TrH][iodide]                                         | [TrH] <sub>2</sub> [oxalate]<br>·10(H <sub>2</sub> O)                                                                      | [Tr]·2(H <sub>2</sub> O)                                                   |
|---------------------------------------------------------------|-------------------------------------------------------|----------------------------------------------------------------------------------------------------------------------------|----------------------------------------------------------------------------|
| Empirical formula                                             | [C <sub>19</sub> H <sub>23</sub> ClN <sub>5</sub> O]I | [C <sub>19</sub> H <sub>23</sub> ClN <sub>5</sub> O] <sub>2</sub><br>[C <sub>2</sub> O <sub>4</sub> ]·10(H <sub>2</sub> O) | C <sub>19</sub> H <sub>22</sub> ClN <sub>5</sub> O<br>·2(H <sub>2</sub> O) |
| Diffractometer                                                | SuperNova                                             | SuperNova                                                                                                                  | SuperNova                                                                  |
| Wavelength (Å)                                                | 0.71073                                               | 1.54184                                                                                                                    | 1.54184                                                                    |
| mol. weight (g/mol)                                           | 499.77                                                | 1013.92                                                                                                                    | 405.88                                                                     |
| Crystal system                                                | monoclinic                                            | monoclinic                                                                                                                 | monoclinic                                                                 |
| Space group                                                   | <i>P</i> 2 <sub>1</sub> / <i>c</i>                    | <i>I</i> 2/ <i>a</i>                                                                                                       | <i>P</i> 2 <sub>1</sub> / <i>c</i>                                         |
| a (Å)                                                         | 12.9279(2)                                            | 15.1489(4)                                                                                                                 | 7.10113(10)                                                                |
| b (Å)                                                         | 12.54570(15)                                          | 13.2904(4)                                                                                                                 | 13.6250(2)                                                                 |
| c (Å)                                                         | 13.13900(15)                                          | 24.5940(8)                                                                                                                 | 20.6821(3)                                                                 |
| α (°)                                                         | 90                                                    | 90                                                                                                                         | 90                                                                         |
| β (°)                                                         | 109.8430(12)                                          | 97.293(3)                                                                                                                  | 91.5054(12)                                                                |
| γ (°)                                                         | 90                                                    | 90                                                                                                                         | 90                                                                         |
| Volume (Å <sup>3</sup> )                                      | 2004.48(5)                                            | 4911.6(3)                                                                                                                  | 2000.36(5)                                                                 |
| Z                                                             | 4                                                     | 4                                                                                                                          | 4                                                                          |
| Density(calc.) (g/cm <sup>3</sup> )                           | 1.656                                                 | 1.371                                                                                                                      | 1.354                                                                      |
| Linear abs. coeff. (mm <sup>-1</sup> )                        | 1.75                                                  | 1.85                                                                                                                       | 1.948                                                                      |
| F(000)                                                        | 1000                                                  | 2152                                                                                                                       | 856                                                                        |
| Crystal size (mm <sup>3</sup> )                               | 0.20 × 0.07 × 0.04                                    | 0.14 × 0.07 × 0.04                                                                                                         | 0.28 × 0.15 × 0.02                                                         |
| Crystal description                                           | plate, colorless                                      | needle, colorless                                                                                                          | plate, colorless                                                           |
| θ range (°)                                                   | 3.248; 33.727                                         | 3.624; 76.973                                                                                                              | 3.886; 74.266                                                              |
| Reflections collected                                         | 27961                                                 | 20149                                                                                                                      | 29860                                                                      |
| Indep. reflections                                            | 7970 [R <sub>int</sub> = 0.0340]                      | 5113 [R <sub>int</sub> = 0.0336]                                                                                           | 4036 [R <sub>int</sub> = 0.0332]                                           |
| Reflections obs.                                              | 6177                                                  | 4562                                                                                                                       | 3588                                                                       |
| Criterion for obs.                                            | I > 2.0σ(I)                                           | I > 2.0σ(I)                                                                                                                | I > 2.0σ(I)                                                                |
| Completeness to θ (°)                                         | 0.995 to 25.242                                       | 1.000 to 67.684                                                                                                            | 1.000 to 67.684                                                            |
| Absorption corr.                                              | multi-scan                                            | gaussian                                                                                                                   | multi-scan                                                                 |
| Min. and max. transm.                                         | 0.649 and 1                                           | 0.783 and 1                                                                                                                | 0.733 and 1                                                                |
| Reflections / restraints / parameters                         | 7970 / 0 / 244                                        | 5113 / 6 / 341                                                                                                             | 4036 / 10 / 337                                                            |
| Goodness-of-fit on F <sup>2</sup>                             | 1.025                                                 | 1.069                                                                                                                      | 1.032                                                                      |
| Final R ind. [I > 2.0σ(I)]                                    | R <sub>1</sub> = 0.0336<br>wR <sub>2</sub> = 0.0626   | R <sub>1</sub> = 0.0445<br>wR <sub>2</sub> = 0.1210                                                                        | R <sub>1</sub> = 0.0408<br>wR <sub>2</sub> = 0.1095                        |
| R indices (all data)                                          | R <sub>1</sub> = 0.0527<br>wR <sub>2</sub> = 0.0684   | R <sub>1</sub> = 0.0485<br>wR <sub>2</sub> = 0.1251                                                                        | R <sub>1</sub> = 0.0456<br>wR <sub>2</sub> = 0.1143                        |
| Final Δρ <sub>max,min</sub> (e <sup>-</sup> /Å <sup>3</sup> ) | 0.71 and -0.45                                        | 0.24 and -0.32                                                                                                             | 0.37 and -0.26                                                             |
| CSD number                                                    | 1585764                                               | 1585765                                                                                                                    | 1585763                                                                    |

## References:

1. M. Tiffner, J. Novacek, A. Busillo, K. Gratzner, A. Massa and M. Waser, *RSC Adv.*, 2015, **5**, 78941-78949.
2. A. McPherson and J. A. Gavira, *Acta Cryst.*, 2014, **F70**, 2-20.
3. Rigaku Oxford Diffraction, CrysAlis<sup>Pro</sup> Software system 1.171.38, Rigaku Corporation, Oxford, UK, 2015.
4. A. Altomare, M. C. Burla, M. Camalli, G. L. Cascarano, C. Giacovazzo, A. Guagliardi, A. G. G. Moliterni, G. Polidori and R. Spagna, *J. Appl. Cryst.*, 1999, **32**, 115-119.
5. L. Palatinus and G. Chapuis, *J. Appl. Cryst.*, 2007, **40**, 786-790.
6. G. M. Sheldrick, *Acta Cryst.*, 2015, **C71**, 3-8.
7. C. B. Hübschle, G. M. Sheldrick and B. Dittrich, *J. Appl. Cryst.*, 2011, **44**, 1281-1284.
8. P. W. Betteridge, J. R. Carruthers, R. I. Cooper, K. Prout and D. J. Watkin, *J. Appl. Cryst.*, 2003, **36**, 1487-1487.
9. C. F. Macrae, I. J. Bruno, J. A. Chisholm, P. R. Edgington, P. McCabe, E. Pidcock, L. Rodriguez-Monge, R. Taylor, J. van de Streek and P. A. Wood, *J. Appl. Cryst.*, 2008, **41**, 466-470.
10. A. V. George, L. D. Field, E. Y. Malouf, A. E. D. McQueen, S. R. Pike, G. R. Purches, T. W. Hambley, I. E. Buys, A. H. White, D. C. R. Hockless and B. W. Skelton, *J. Organomet. Chem.*, 1997, **538**, 101-110.
11. A. Rodriguez-Forteza, P. Alemany, S. Alvarez, E. Ruiz, A. Sculler, C. Decroix, V. Marvaud, J. Vaissermann, M. Verdaguer, I. Rosenman and M. Julve, *Inorg. Chem.*, 2001, **40**, 5868-5877.
12. A. Peuronen, E. Lehtimäki and M. Lahtinen, *Cryst. Growth Des.*, 2013, **13**, 4615-4622.
13. E. A. Collier, R. J. Davey, S. N. Black and R. J. Roberts, *Acta Cryst.*, 2006, **B62**, 498-505.
14. B. Gossner and H. Neff, *Z. Kristallogr.*, 1933, **86**, 32-41.
15. K. Schwantke, *Z. Kristallogr.*, 1909, **46**, 73-115.
16. A. L. Spek, *J. Appl. Cryst.*, 2003, **36**, 7-13.
17. R. W. W. Hooft, L. H. Straver and A. L. Spek, *J. Appl. Cryst.*, 2008, **41**, 96-103.
